# Supplementary material for: On the Road towards Small-Molecule Programmed Cell Death 1 Ligand 1 Positron Emission Tomography Tracers: A Ligand-Based Drug Design Approach
Source: MDPI journal article supplement (doi:10.3390/ph16071051), 2023-07-24

## Supplementary information

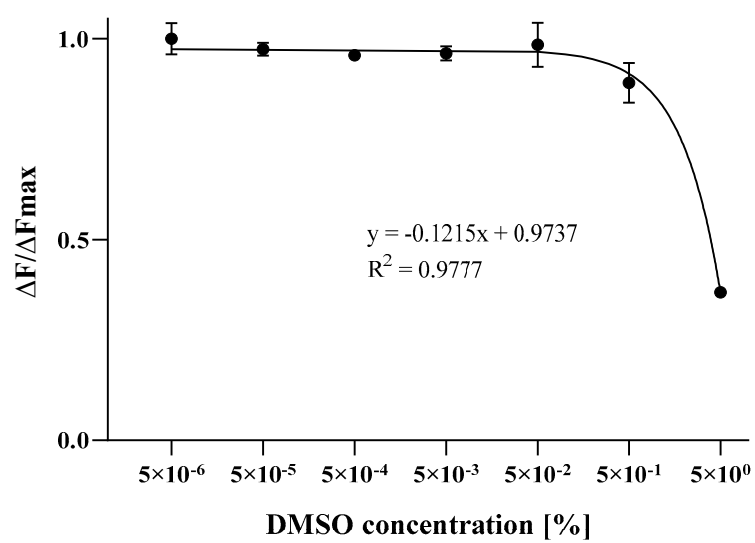

**Supplementary Figure S1:** Influence of DMSO concentration on HTRF measurements. DMSO significantly quenched the fluorescence intensity at 665 nm but not 620 nm above 0.5% concentrations.

## Ligand docking experiments

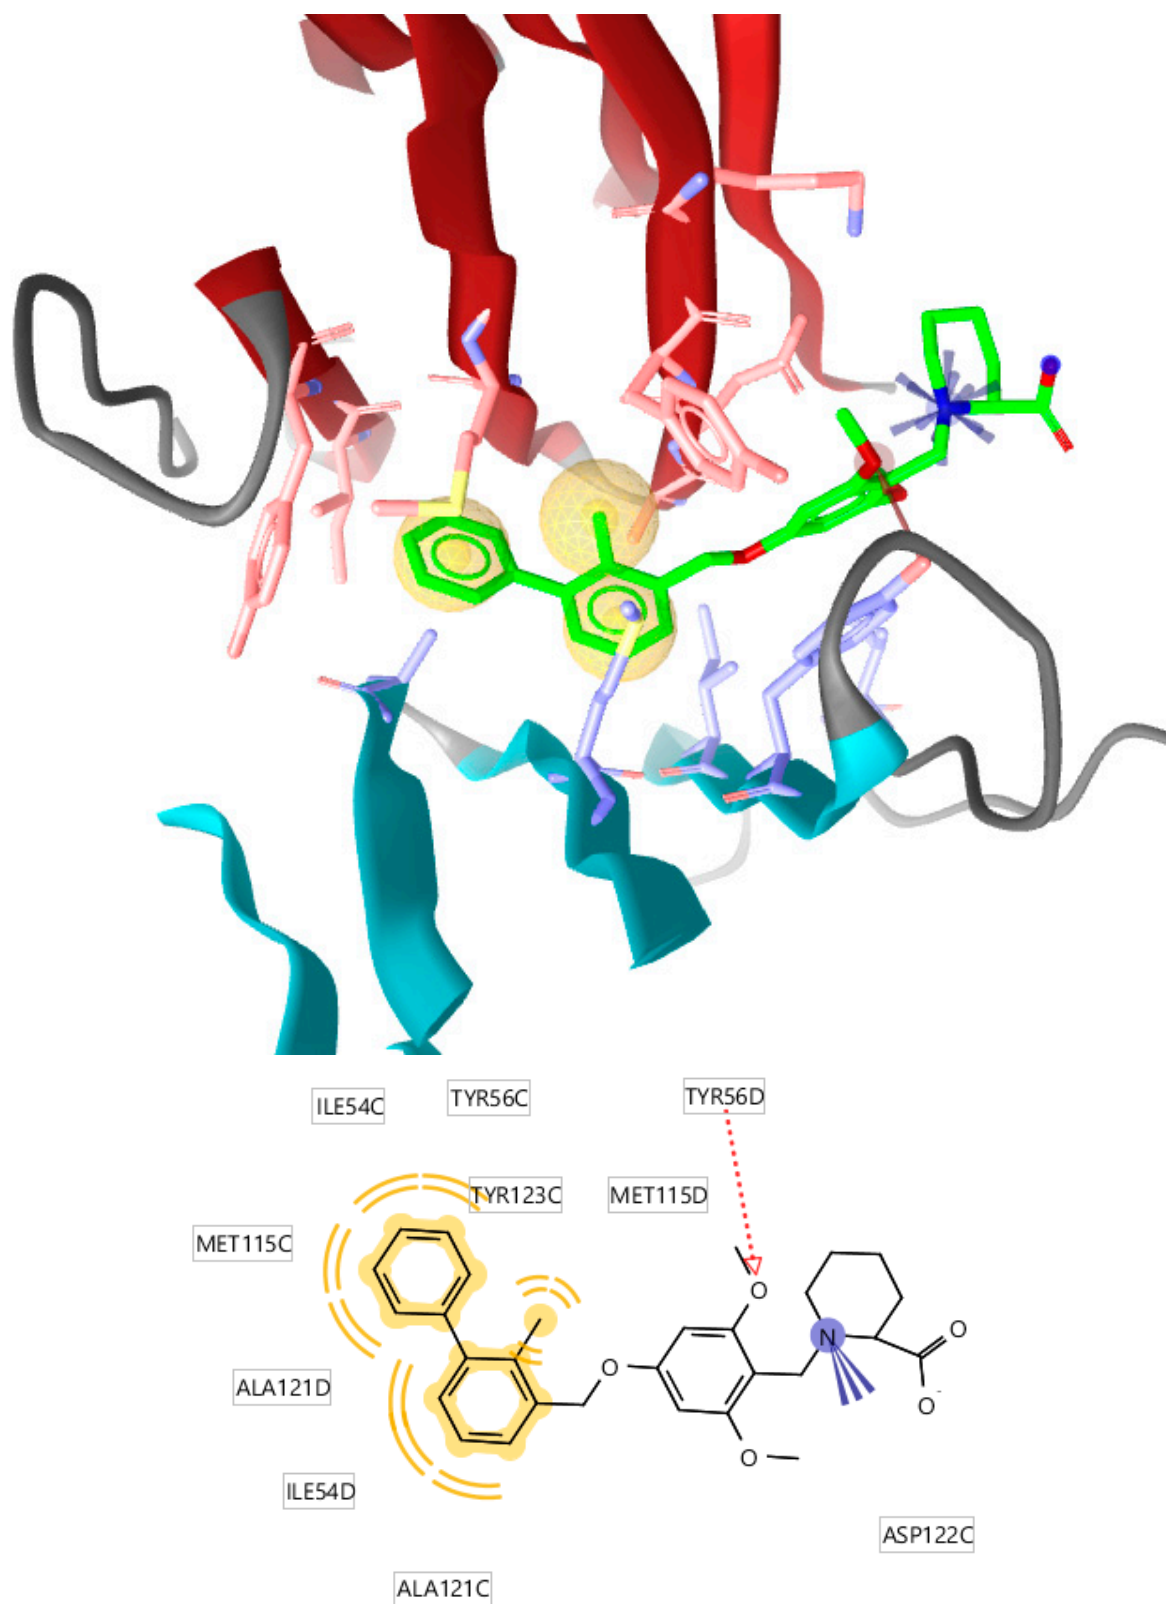

**Supplementary Figure S2:** Docking pose and pharmacophore of lead structure 1 (green) between PD-L1 monomer C (red) and monomer D (blue).

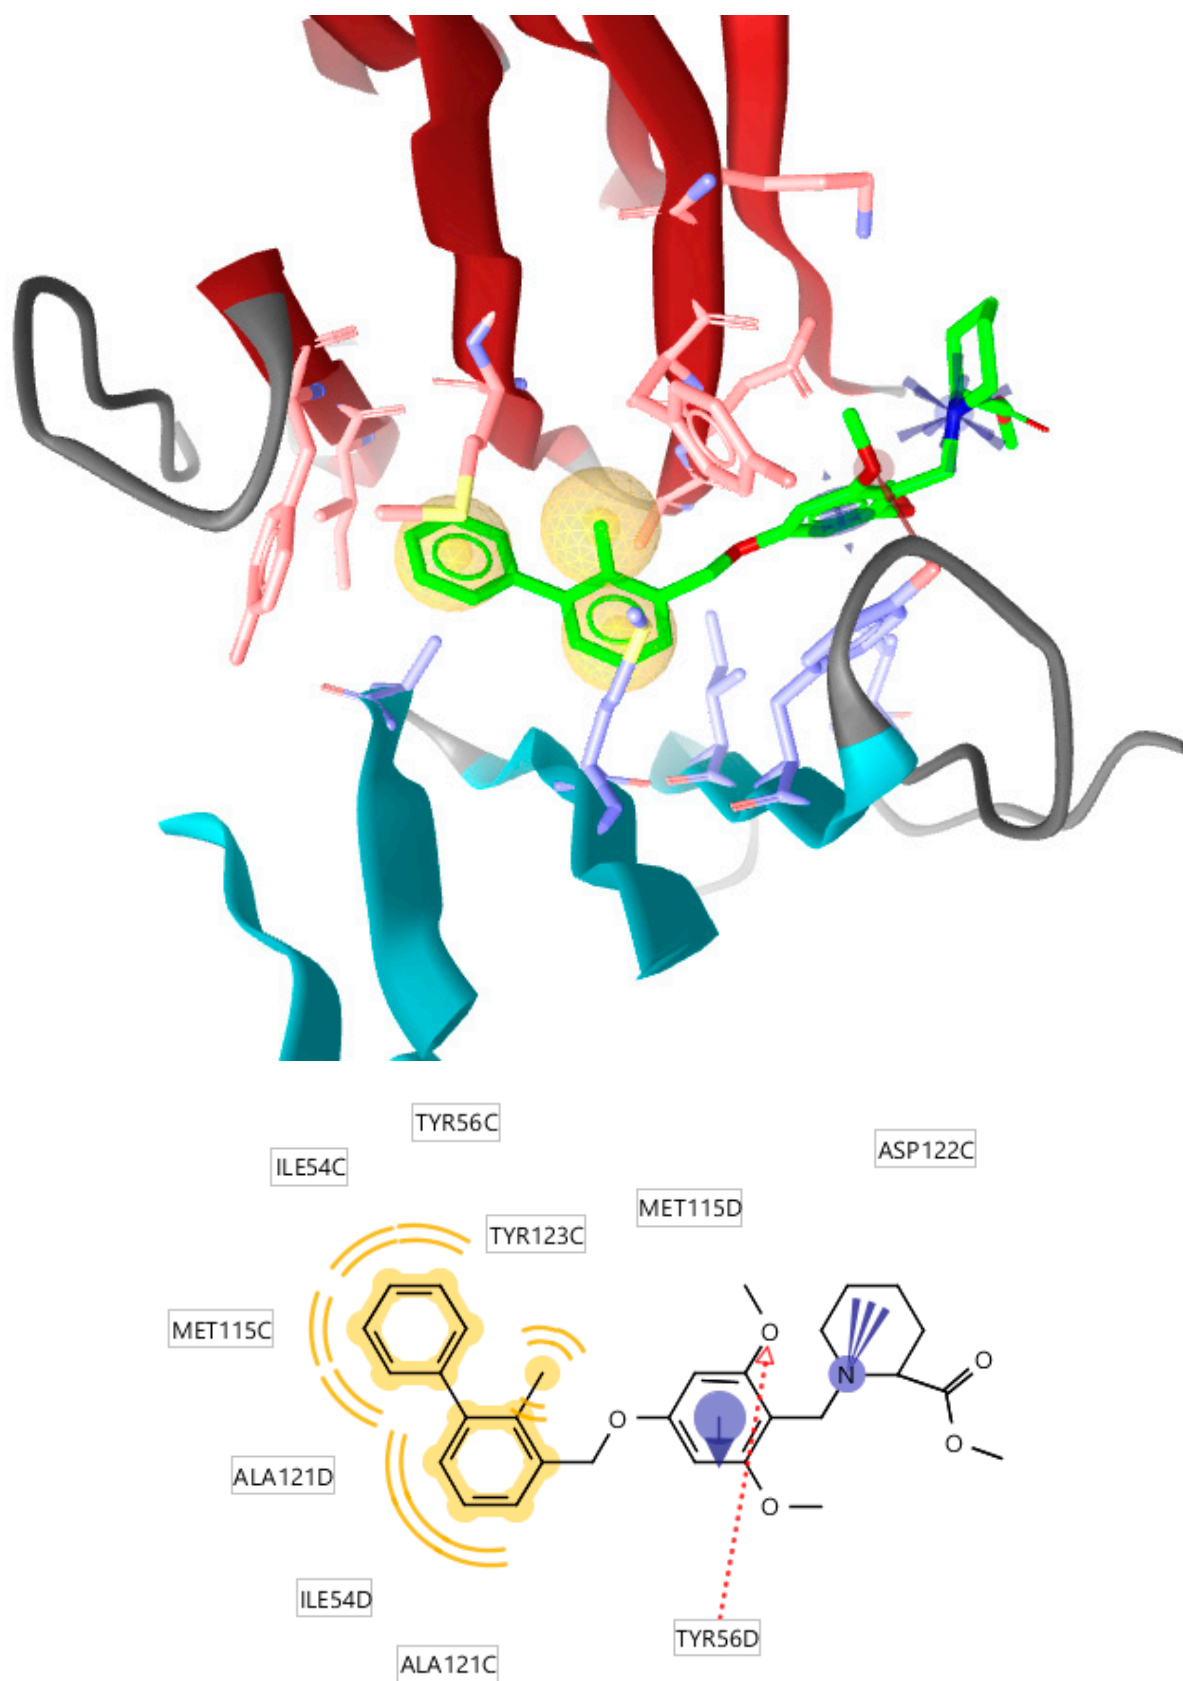

**Supplementary Figure S3:** Docking pose and pharmacophore of **1a** (green) between PD-L1 monomer C (red) and monomer D (blue).

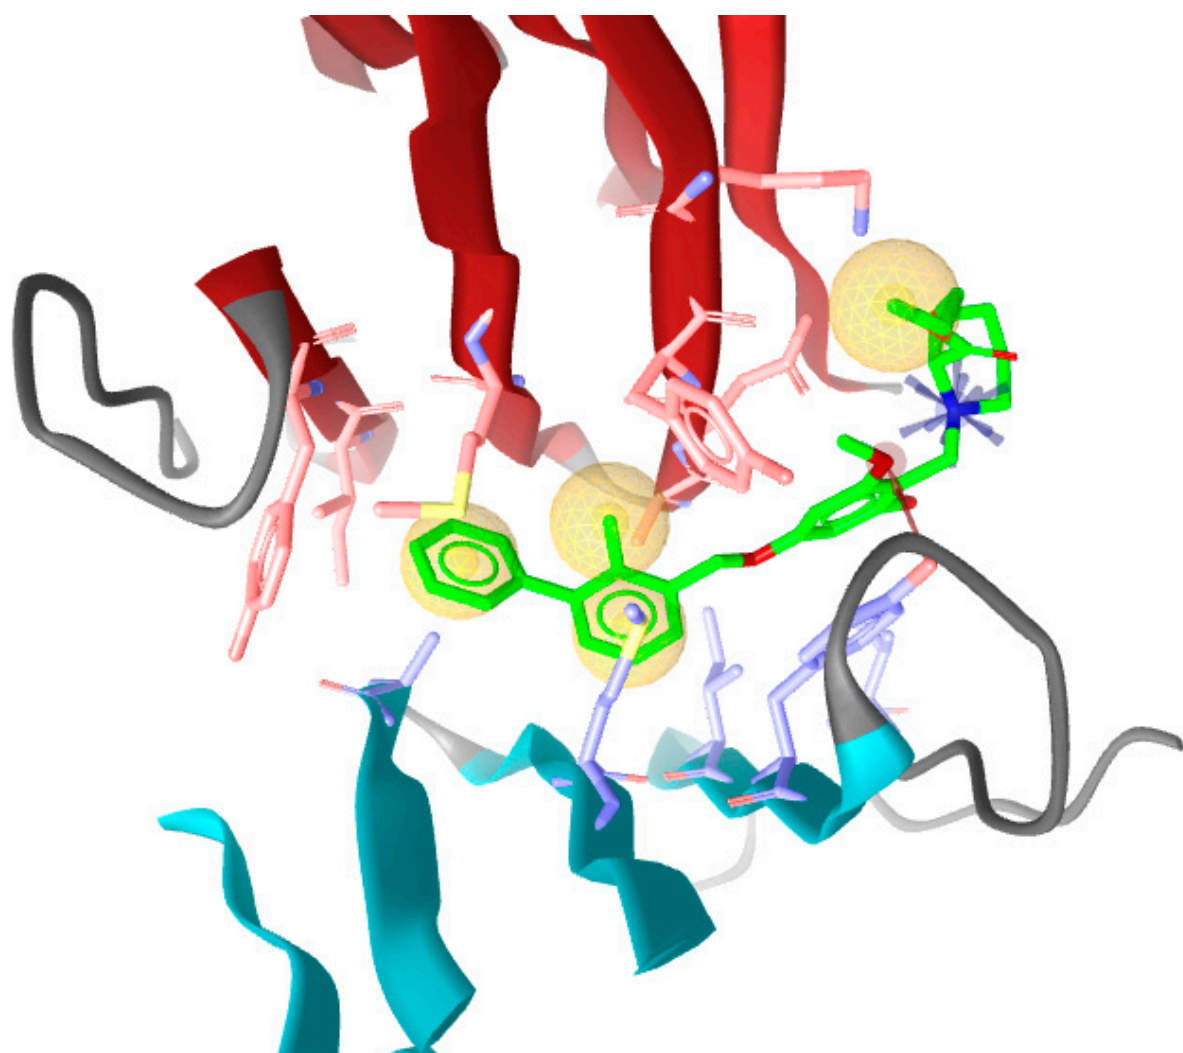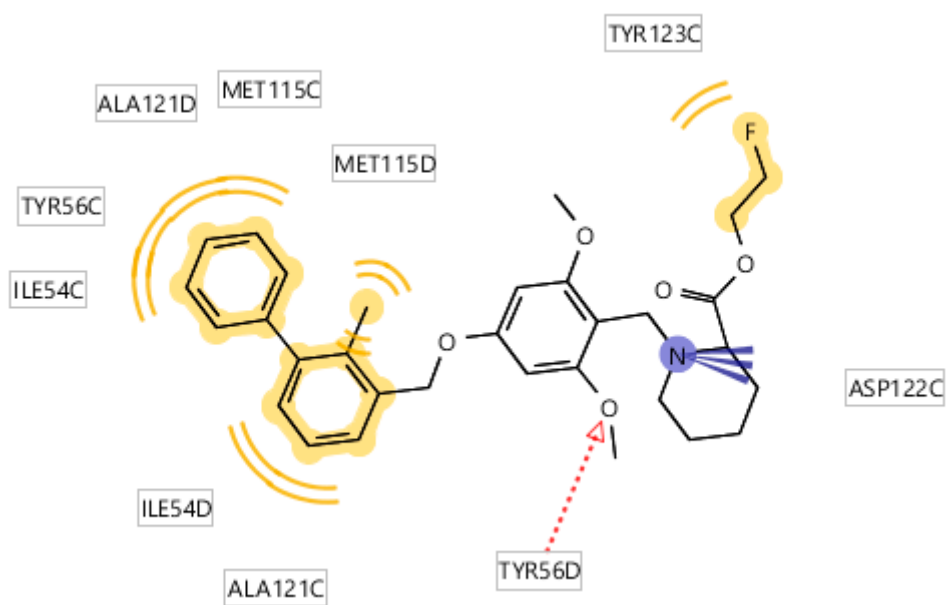

**Supplementary Figure S4:** Docking pose and pharmacophore of **1b** (green) between PD-L1 monomer C (red) and monomer D (blue).

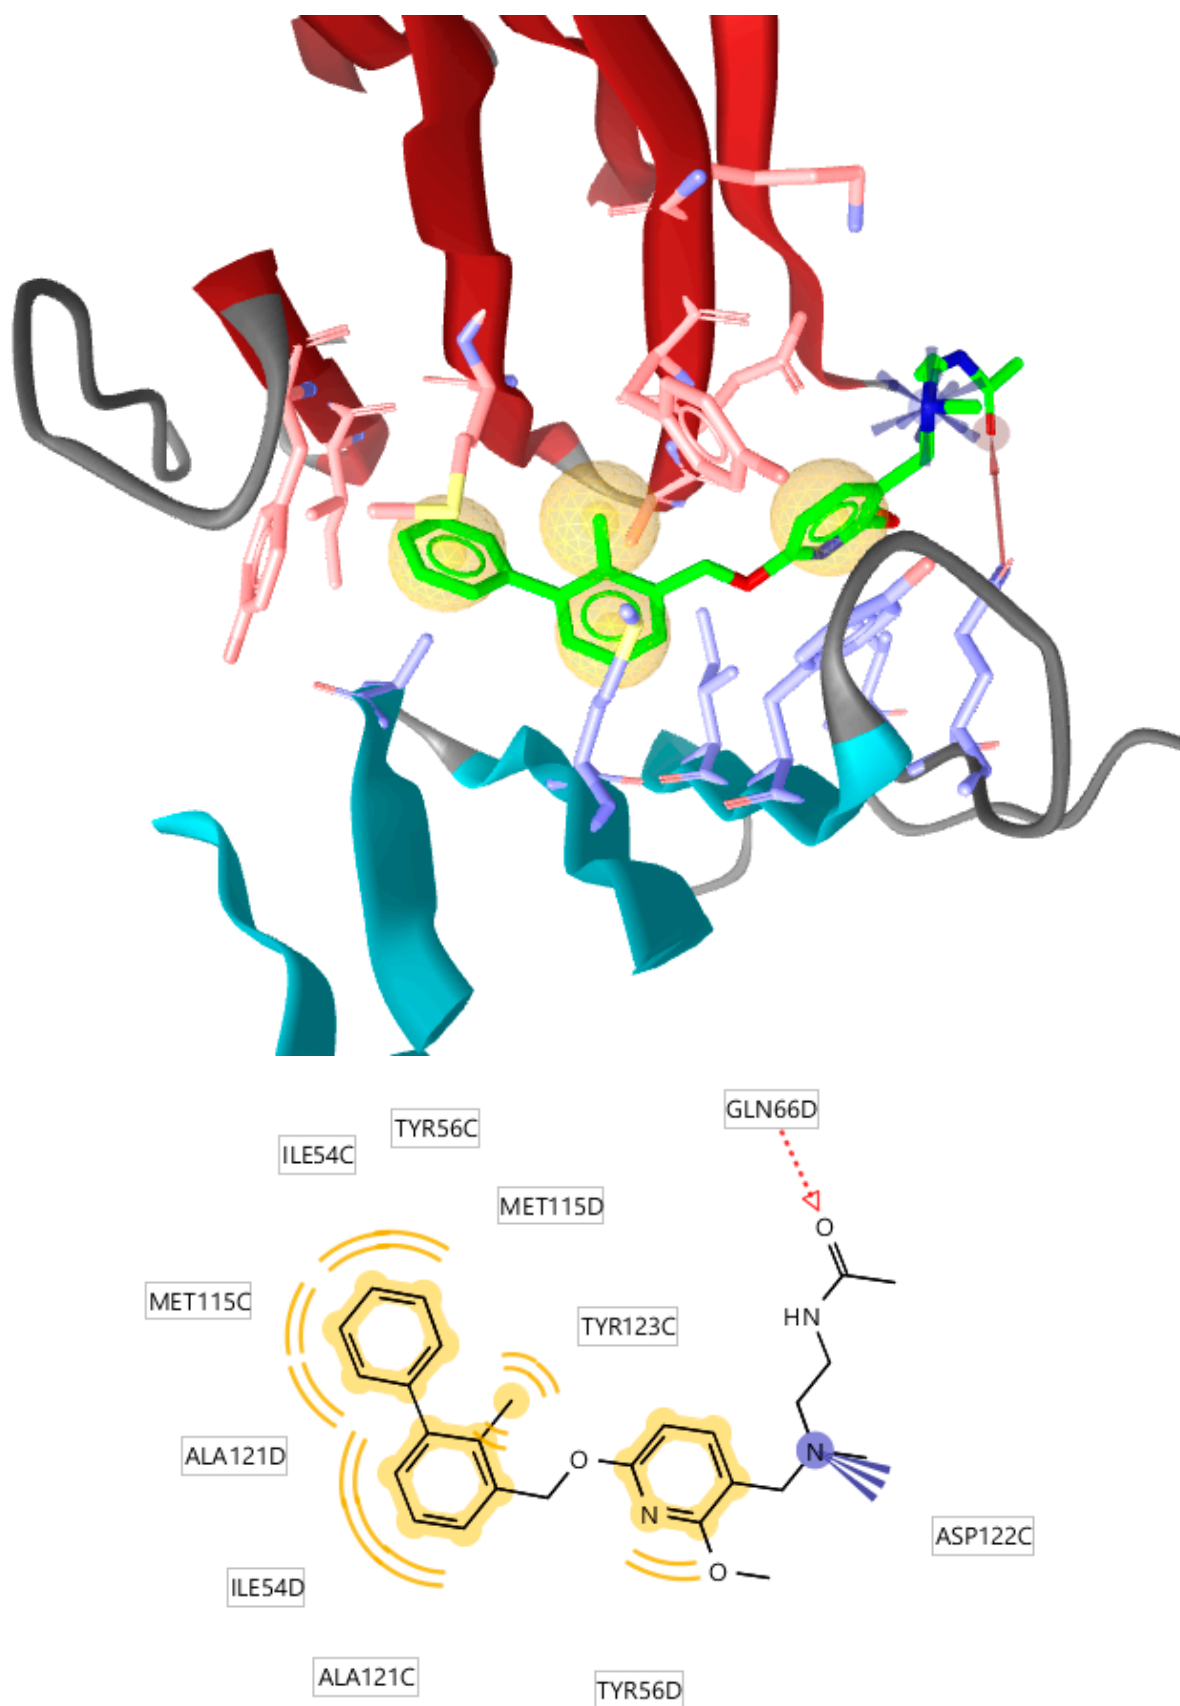

**Supplementary Figure S5:** Docking pose and pharmacophore of **2a** (green) between PD-L1 monomer C (red) and monomer D (blue).

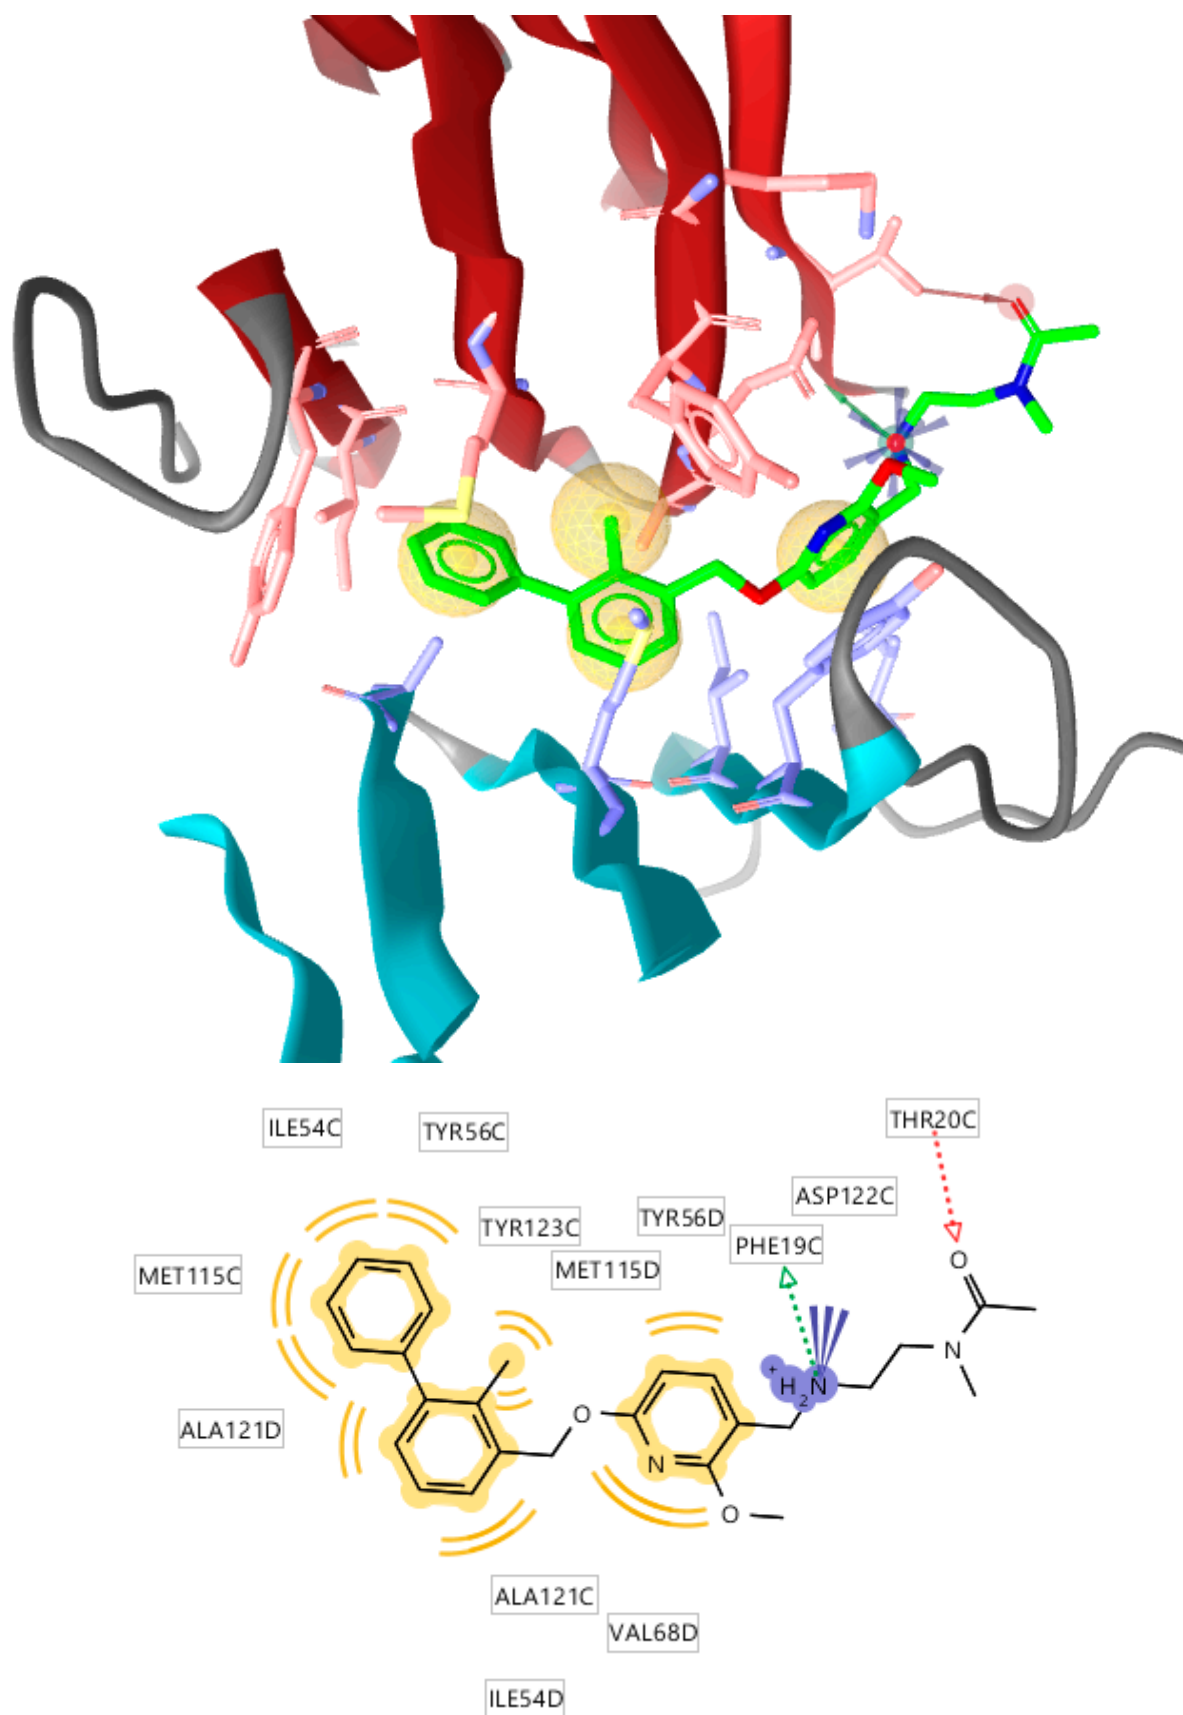

**Supplementary Figure S6:** Docking pose and pharmacophore of **2b** (green) between PD-L1 monomer C (red) and monomer D (blue).



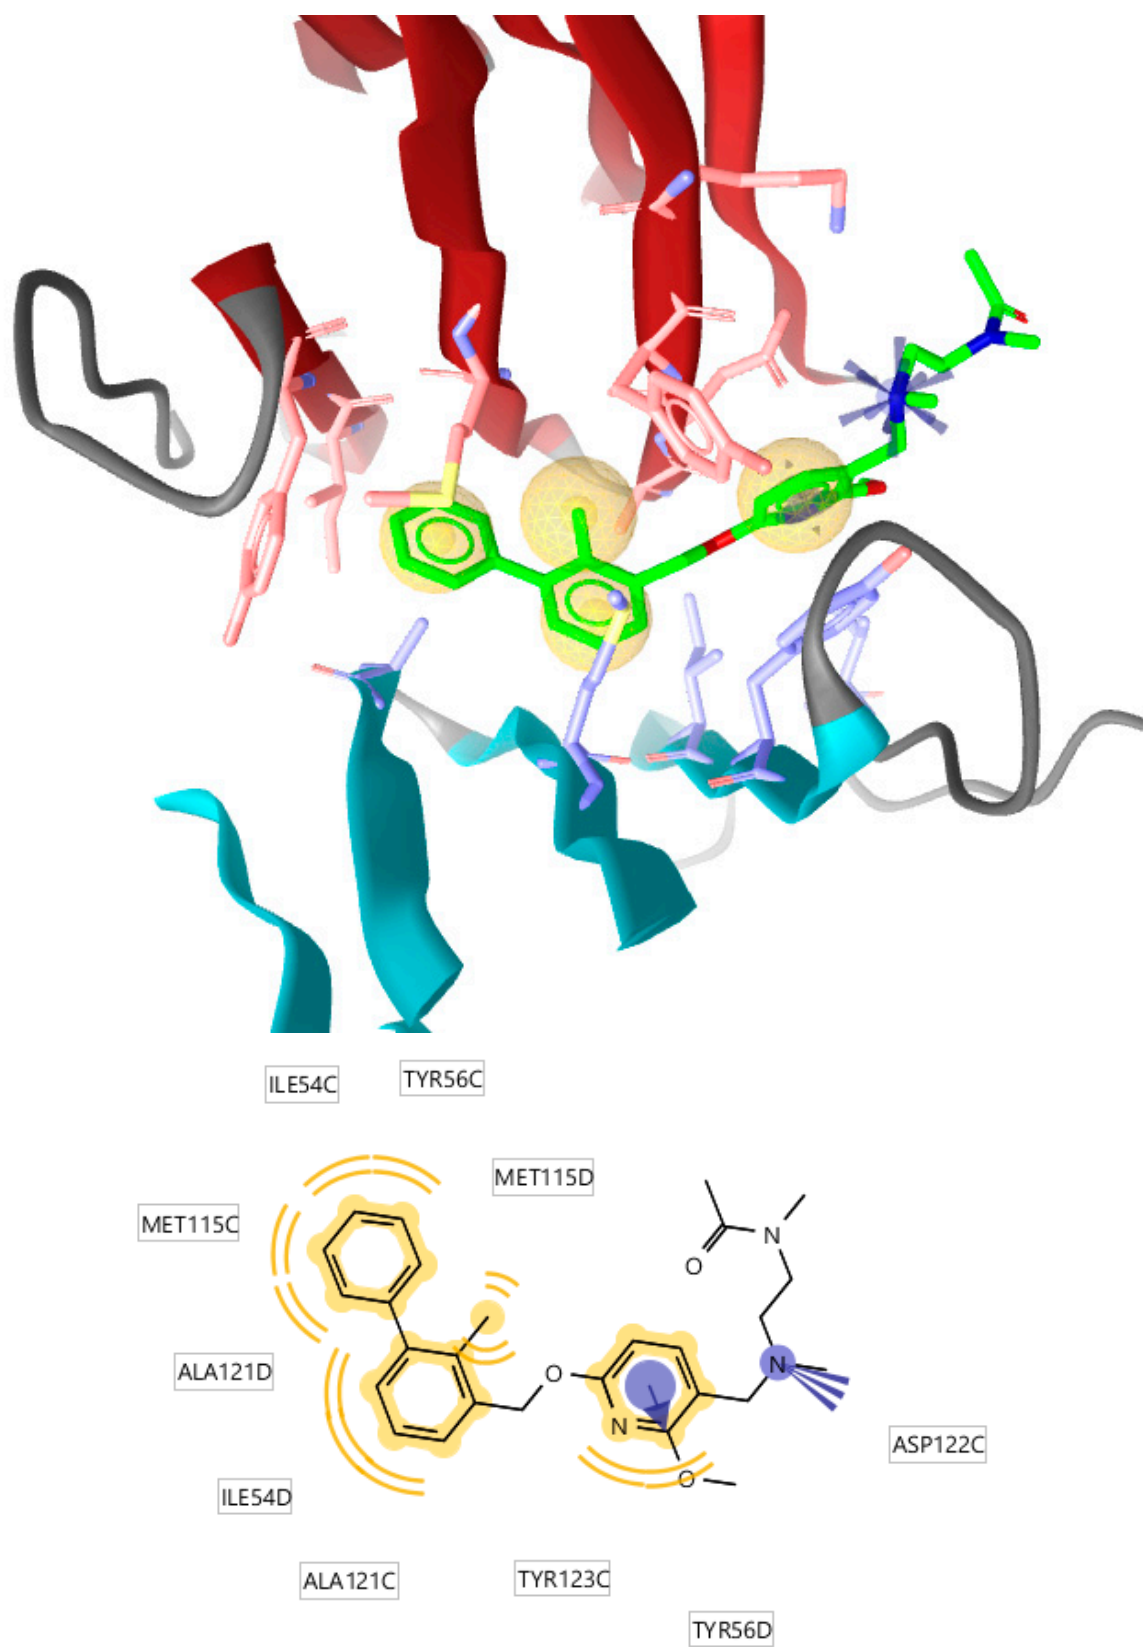

**Supplementary Figure S7:** Docking pose and pharmacophore of **2c** (green) between PD-L1 monomer C (red) and monomer D (blue).

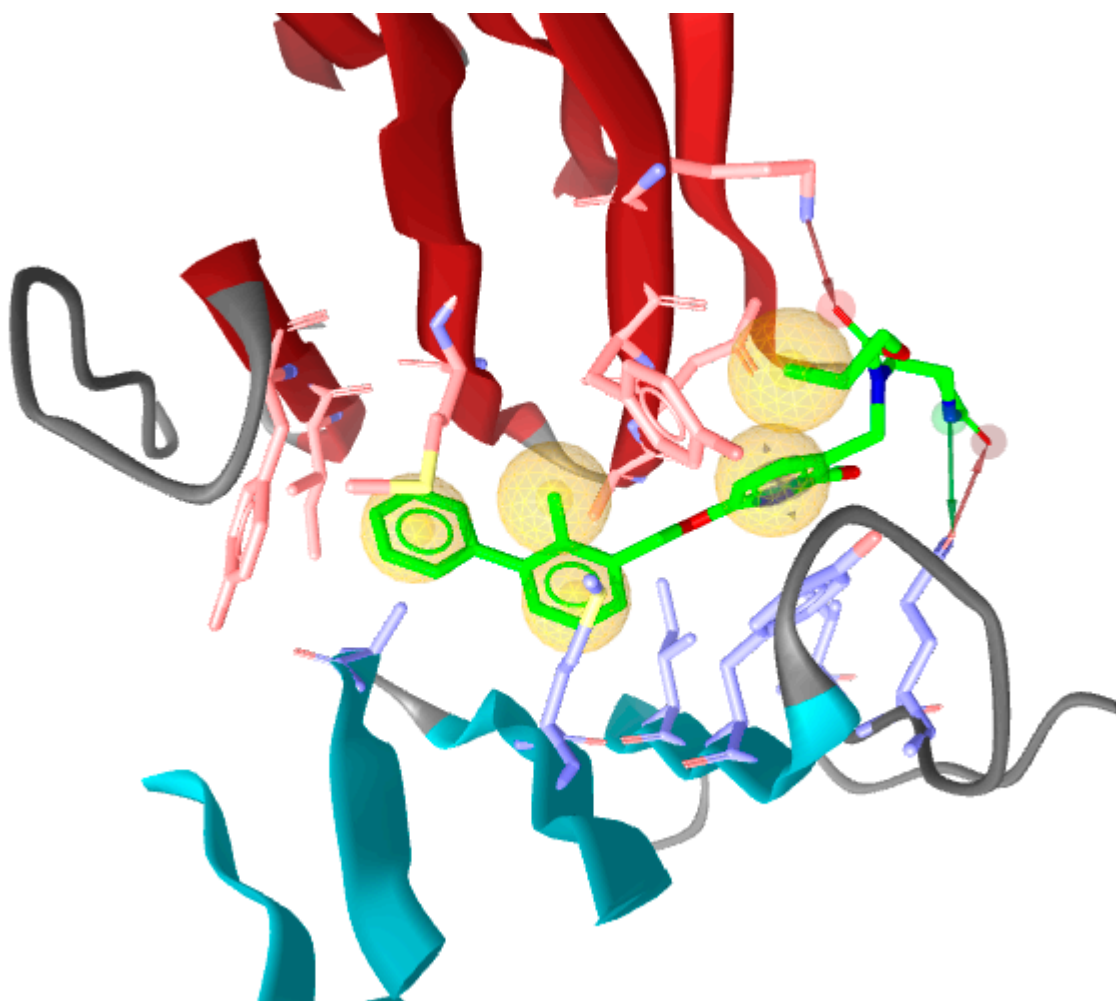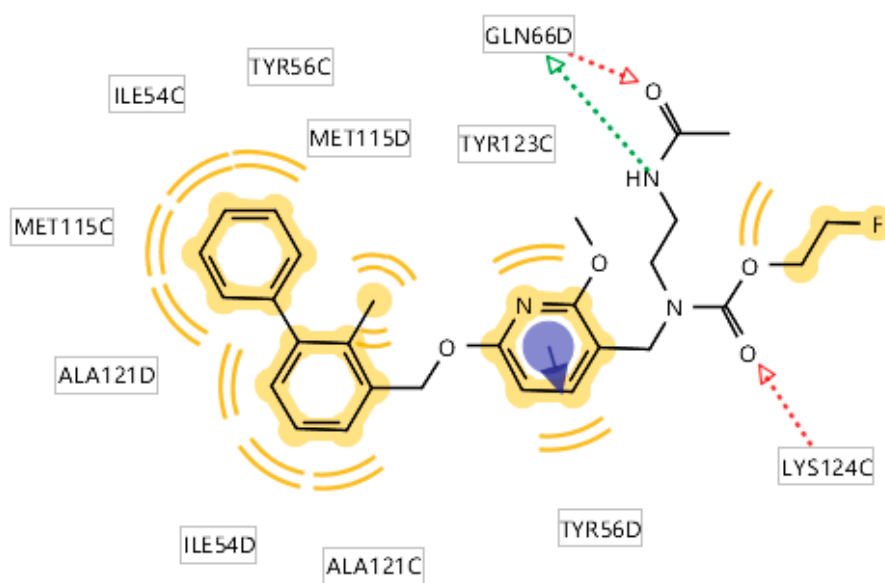

**Supplementary Figure S8:** Docking pose and pharmacophore of **2d** (green) between PD-L1 monomer C (red) and monomer D (blue).



**Supplementary Table S1:** Overview of synthesis attempts using different reactions and reaction conditions, including the chemical structures of the lead compounds **1** and **2** as well as the six synthesized products: monomethylated products **1a**, **2a** and **2b**, dimethylated product **2c**, fluoroethylated product **1b** as well as product **2d** with a fluoroethyl carbamate unit. DCM = dichloromethane, DMAP = 4-dimethylaminopyridine, DCC = N,N'-dicyclohexylcarbodiimide, CDI = 1,1'-carbonyldiimidazole, MeI = methyl iodide, ODCB = 1,2-dichlorobenzene, DTBP = di-*tert*-butyl peroxide, TBAH = tetrabutylammonium hydroxide, FETos = 2-fluoroethyl *p*-toluenesulfonate, DIPEA = *N,N*-diisopropylethylamine.

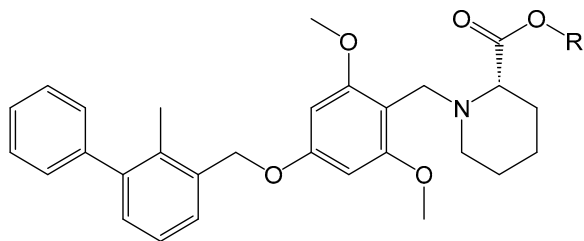

**1:** R = -H;  
**1a:** R = -CH<sub>3</sub>;  
**1b:** R = -C<sub>2</sub>H<sub>4</sub>F;

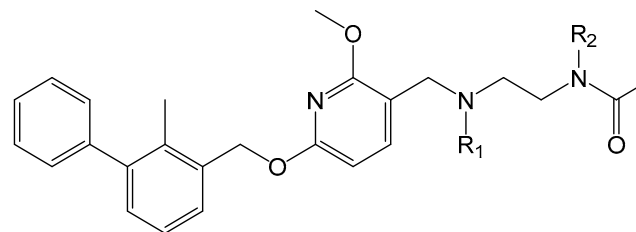

**2:**  $R_1 = -H$ ,  $R_2 = -H$ ;  
**2a:**  $R_1 = -CH_3$ ,  $R_2 = -H$ ;  
**2b:**  $R_1 = -H$ ,  $R_2 = -CH_3$ ;  
**2c:**  $R_1 = -CH_3$ ,  $R_2 = -CH_3$ ;  
**2d:**  $R_1 = -CO_2C_2H_4F$ ,  $R_2 = -H$ ;  
**Boc-2:**  $R_1 = -Boc$ ,  $R_2 = -H$ ;  
**Me-Boc-2:**  $R_1 = -Boc$ ,  $R_2 = -CH_3$ ;  
**FE-2:**  $R_1 = -C_7H_4F$ ,  $R_2 = -H$ ;

| Entry | Substrate | Product | Solvent | Reagent(s) (equivalent)                                     | Temperature | Time       | Yield [%] | Reaction                       |
|-------|-----------|---------|---------|-------------------------------------------------------------|-------------|------------|-----------|--------------------------------|
| 1     | 1         | 1a      | MeOH    | H <sub>2</sub> SO <sub>4</sub> (cat.)                       | reflux      | up to 24 h | 0         | Fischer esterification         |
| 2     | 1         | 1a      | MeOH    | SOCl <sub>2</sub> (1.1 eq.)                                 | rt          | up to 48 h | 0         | Conversion into acyl chloride  |
| 3     | 1         | 1a      | DCM     | MeOH (3.5 eq.),<br>DMAP (cat.),<br>DCC (1.1)                | 0°C → rt    | up to 24 h | 19        | Steglich esterification        |
| 4     | 1         | 1a      | THF     | 1) CDI (2.7 eq.),<br>2) MeOH (1.0 eq.)                      | 50°C        | 5 h        | 29        | Conversion into acyl imidazole |
| 5     | 1         | 1a      | DMSO    | Cs <sub>2</sub> CO <sub>3</sub> (1.5 eq.),<br>MeI (3.0 eq.) | 60°C        | 24 h       | 5         | Nucleophilic substitution      |

|    |          |          |      |                                                               |       |            |    |                                             |
|----|----------|----------|------|---------------------------------------------------------------|-------|------------|----|---------------------------------------------|
| 6  | 1        | 1a       | ODCB | CuI (cat.),<br>DTBP (2.0 eq.)                                 | 110°C | up to 24 h | 0  | Metal-catalysed O-methylation               |
| 7  | 1        | 1b       | DMSO | Cs <sub>2</sub> CO <sub>3</sub> (3.2 eq.),<br>FETos (4.0 eq.) | 100°C | 10 min     | 61 | Nucleophilic substitution                   |
| 8  | 2        | 2a       | MeCN | MeI (3.0 eq.)                                                 | 50°C  | 30 min     | 41 | Nucleophilic substitution                   |
| 9  | 2        | 2a       | ODCB | CuI (cat.),<br>DTBP (2.0 eq.)                                 | 110°C | up to 24 h | 0  | Metal-catalysed N-methylation               |
| 10 | 2        | Boc-2    | THF  | Boc <sub>2</sub> O (1.2 eq.)                                  | rt    | 24 h       | 85 | Boc protection                              |
| 11 | Boc-I2   | Me-Boc-2 | MeCN | TBAH (5.0 eq.),<br>MeI (6.0 eq.)                              | 100°C | 10 min     | 9  | Nucleophilic substitution                   |
| 12 | Me-Boc-2 | 2b       | MeCN | conc. HCl (excess)                                            | rt    | 24 h       | 68 | Boc deprotection                            |
| 13 | 2        | 2c       | DMSO | TBAH (1.2 eq.),<br>MeI (3.0 eq.)                              | 100°C | 20 min     | 8  | Nucleophilic substitution                   |
| 14 | 2        | FE-2     | DMF  | DIPEA (1.0 eq.),<br>FETos (1.2 eq.)                           | 60°C  | up to 24 h | 0  | Nucleophilic substitution                   |
| 15 | 2        | FE-2     | DMF  | DIPEA (1.0 eq.),<br>FETos (1.2 eq.)                           | 100°C | up to 24 h | 0  | Nucleophilic substitution                   |
| 16 | 2        | FE-2     | DMSO | KO <sup>t</sup> Bu (3.0 eq.),<br>FETos (1.2 eq.)              | 100°C | 20 min     | 0  | Nucleophilic substitution                   |
| 17 | 2        | 2d       | DMSO | Cs <sub>2</sub> CO <sub>3</sub> (3.2 eq.),<br>FETos (4.0 eq.) | 100°C | 10 min     | 75 | Carbamylation and nucleophilic substitution |

## In-solution stability

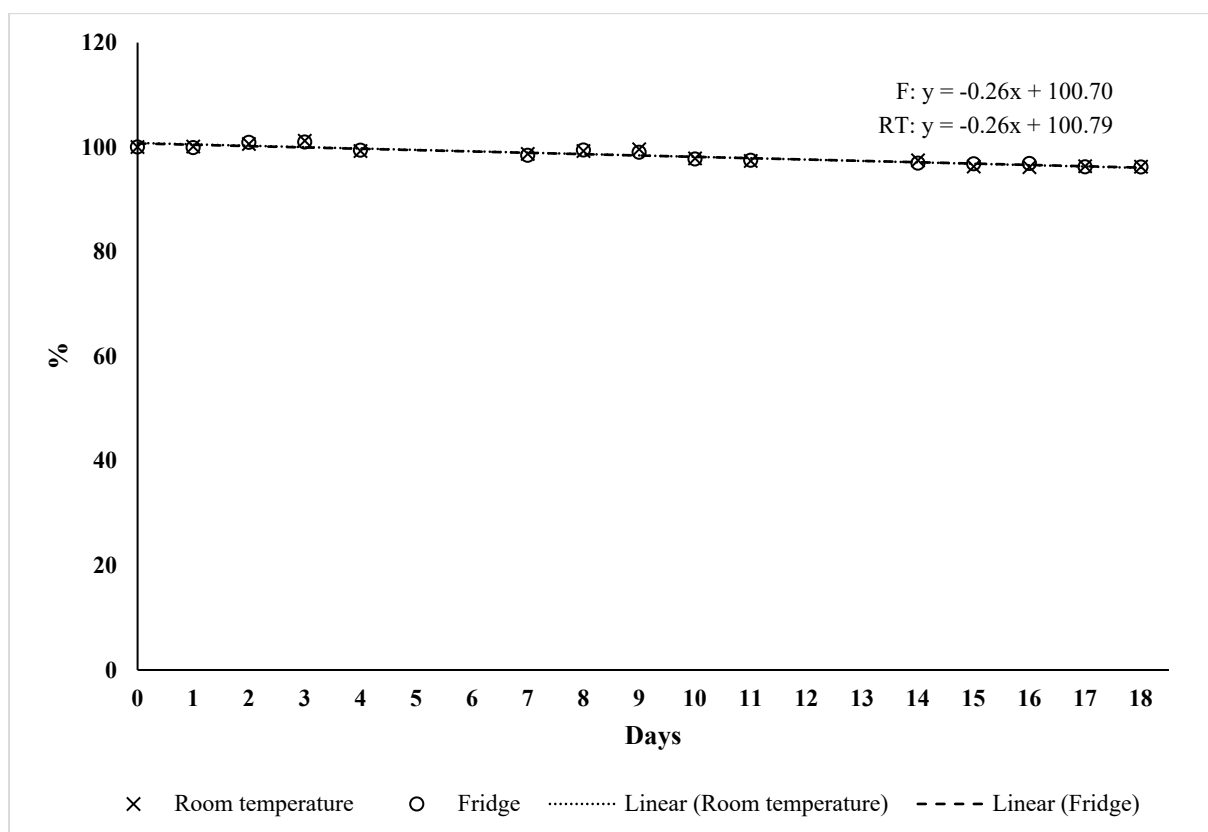

**Supplementary Figure S9:** Interday stability of lead structure 1 in 1:1 DMSO and 10 mM HEPES-NaOH pH 7.5 with 150 mM NaCl.

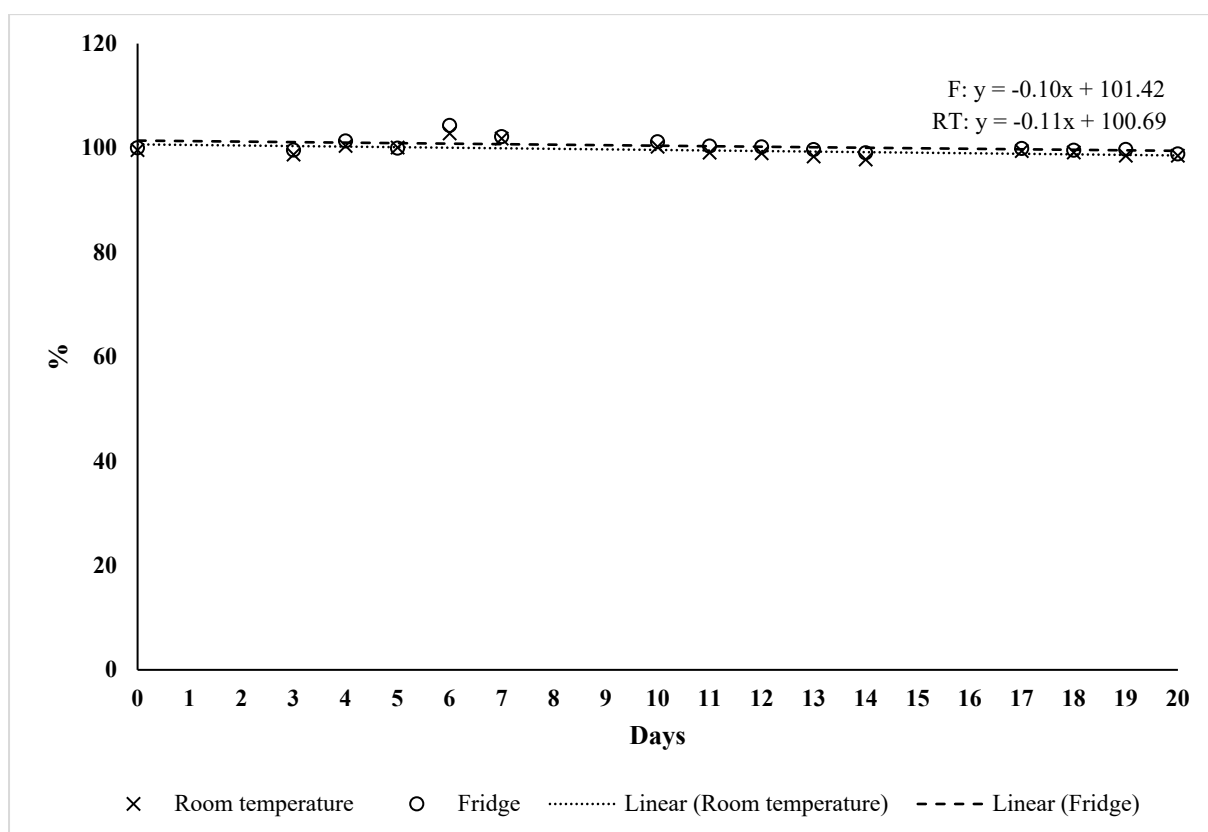

**Supplementary Figure S10:** Interday stability of lead structure 2 in 1:1 DMSO and 10 mM HEPES-NaOH pH 7.5 with 150 mM NaCl.

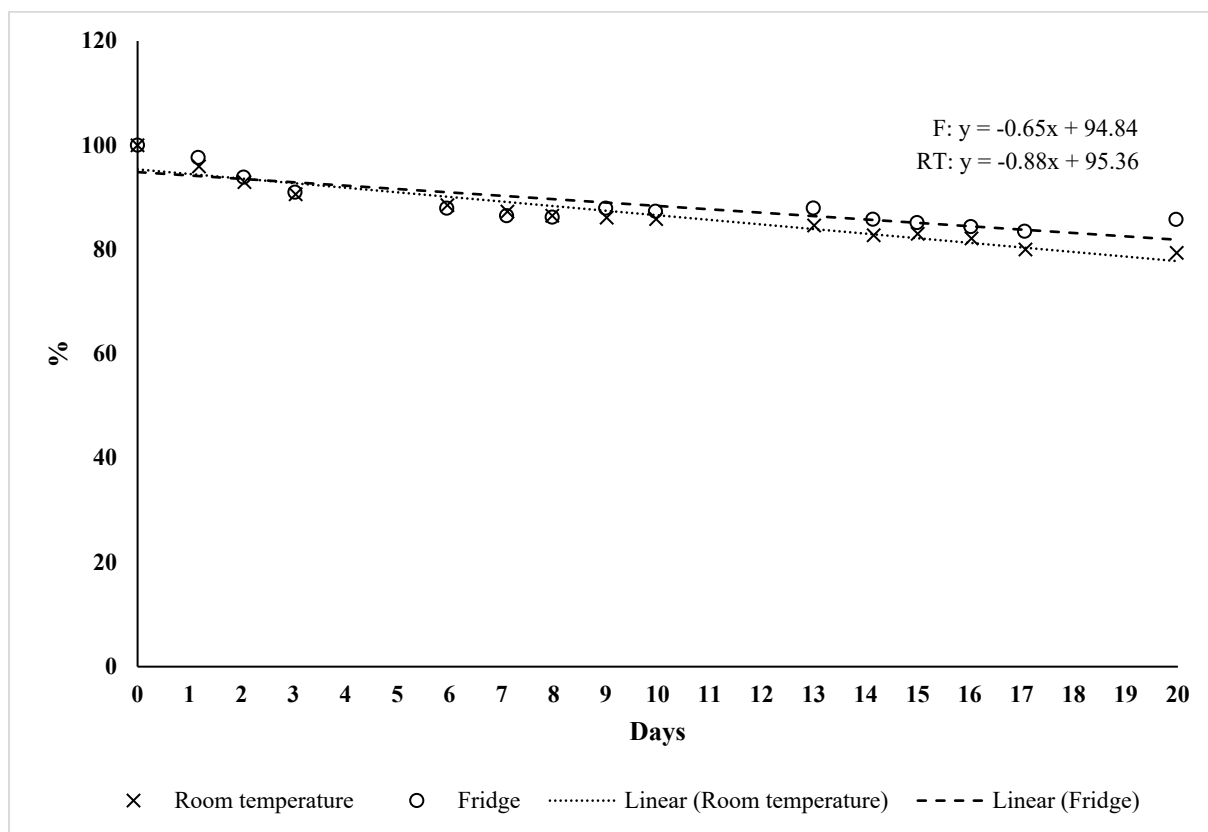

**Supplementary Figure S11:** Interday stability of **1a** in 1:1 DMSO and 10 mM HEPES-NaOH pH 7.5 with 150 mM NaCl.

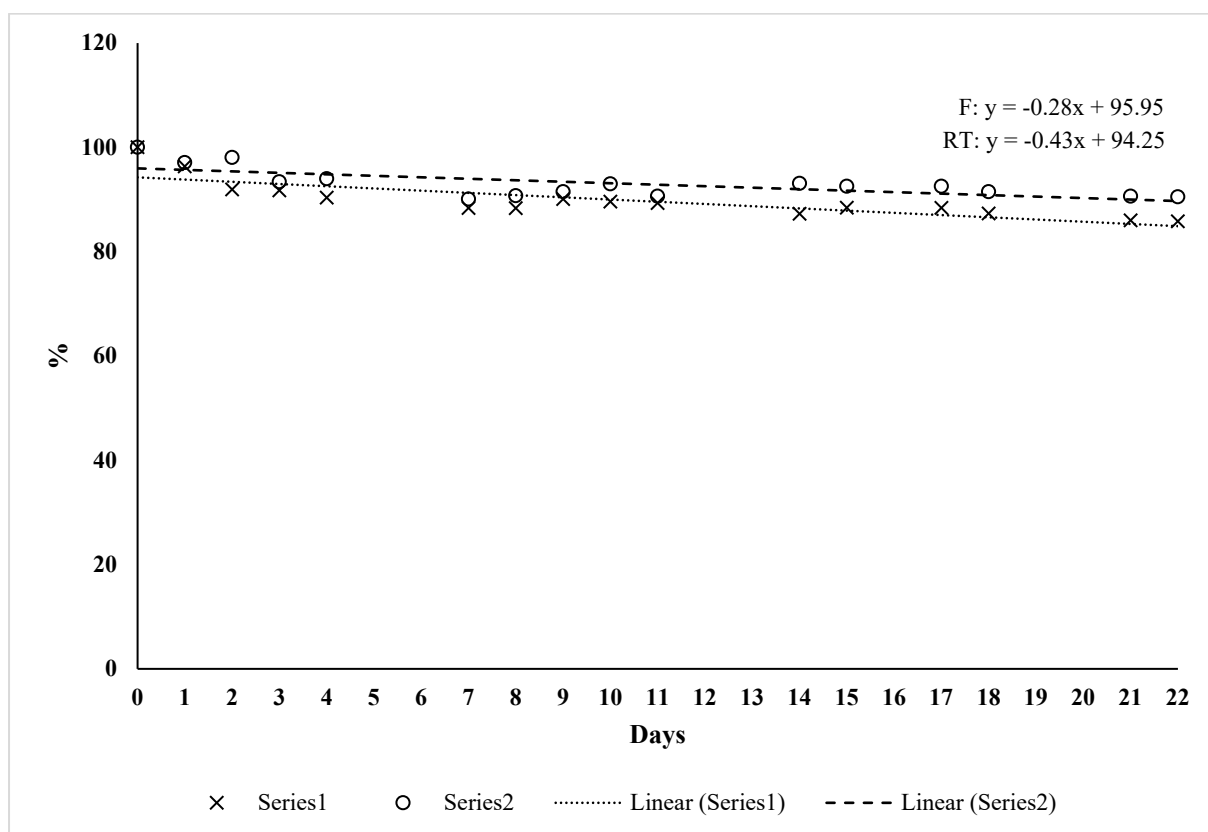

**Supplementary Figure S12:** Interday stability of **1b** in 1:1 DMSO and 10 mM HEPES-NaOH pH 7.5 with 150 mM NaCl.

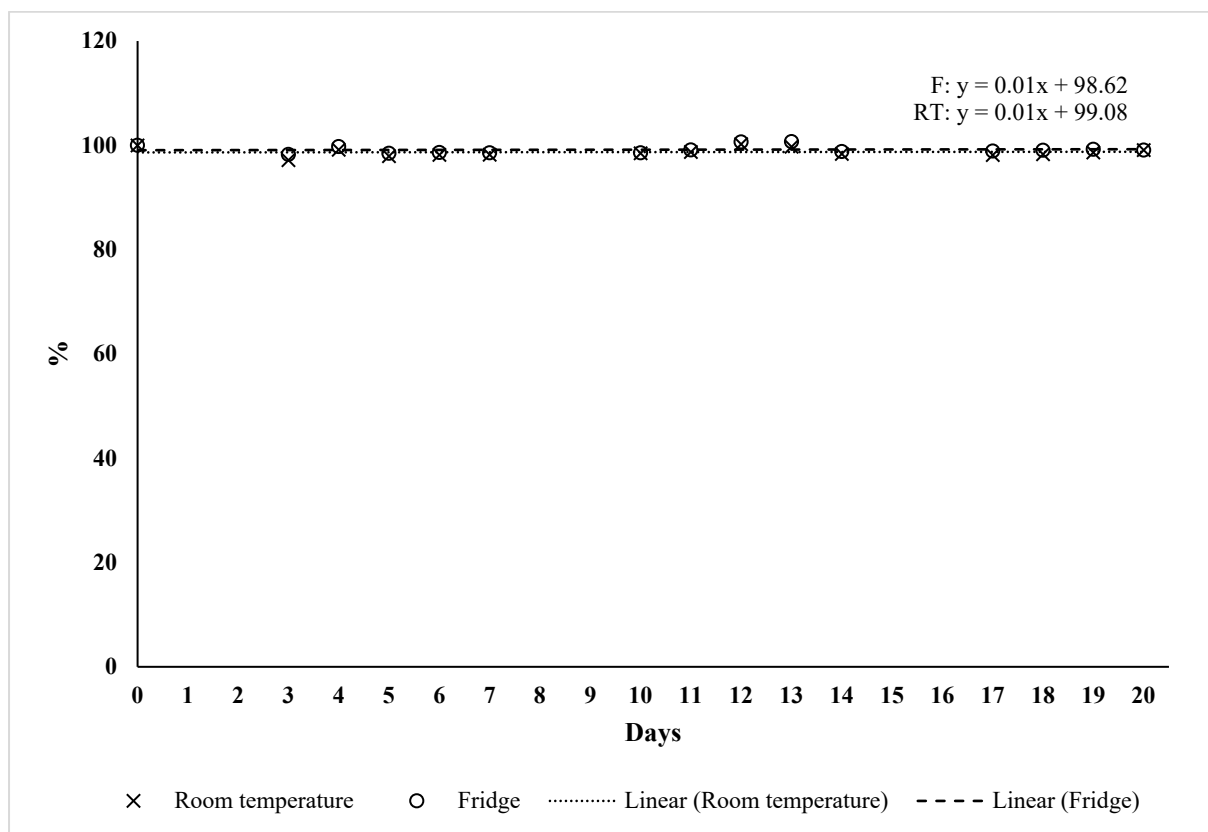

**Supplementary Figure S13:** Interday stability of **2a** in 1:1 DMSO and 10 mM HEPES-NaOH pH 7.5 with 150 mM NaCl.

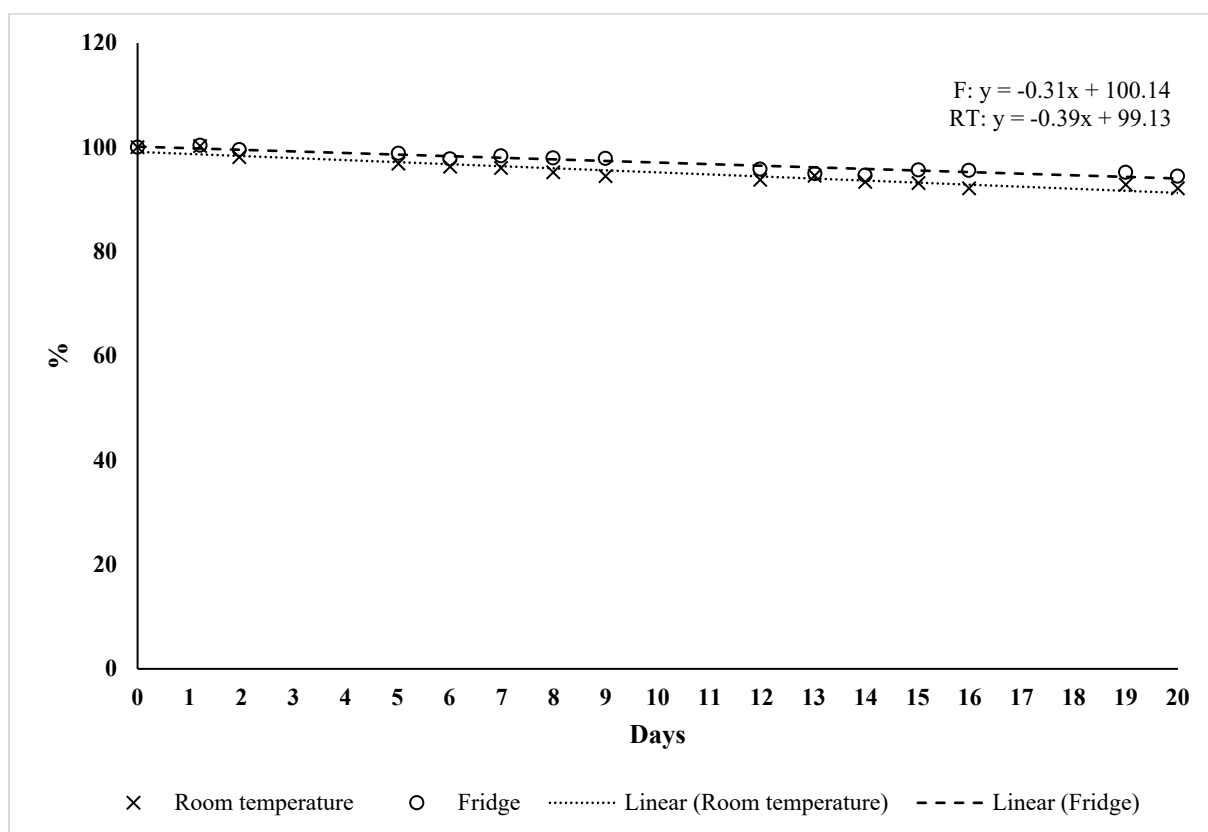

**Supplementary Figure S14:** Interday stability of **2b** in 1:1 DMSO and 10 mM HEPES-NaOH pH 7.5 with 150 mM NaCl.

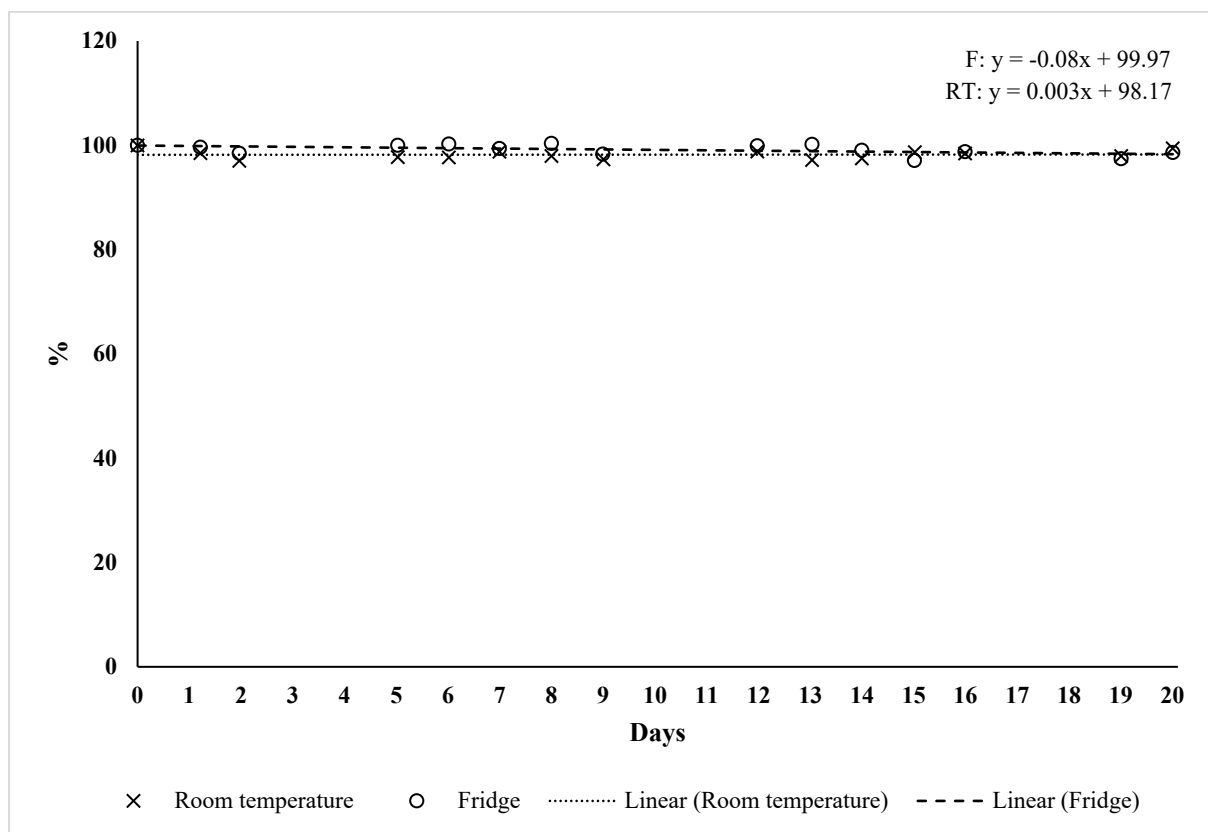

**Supplementary Figure S15:** Interday stability of **2c** in 1:1 DMSO and 10 mM HEPES-NaOH pH 7.5 with 150 mM NaCl.

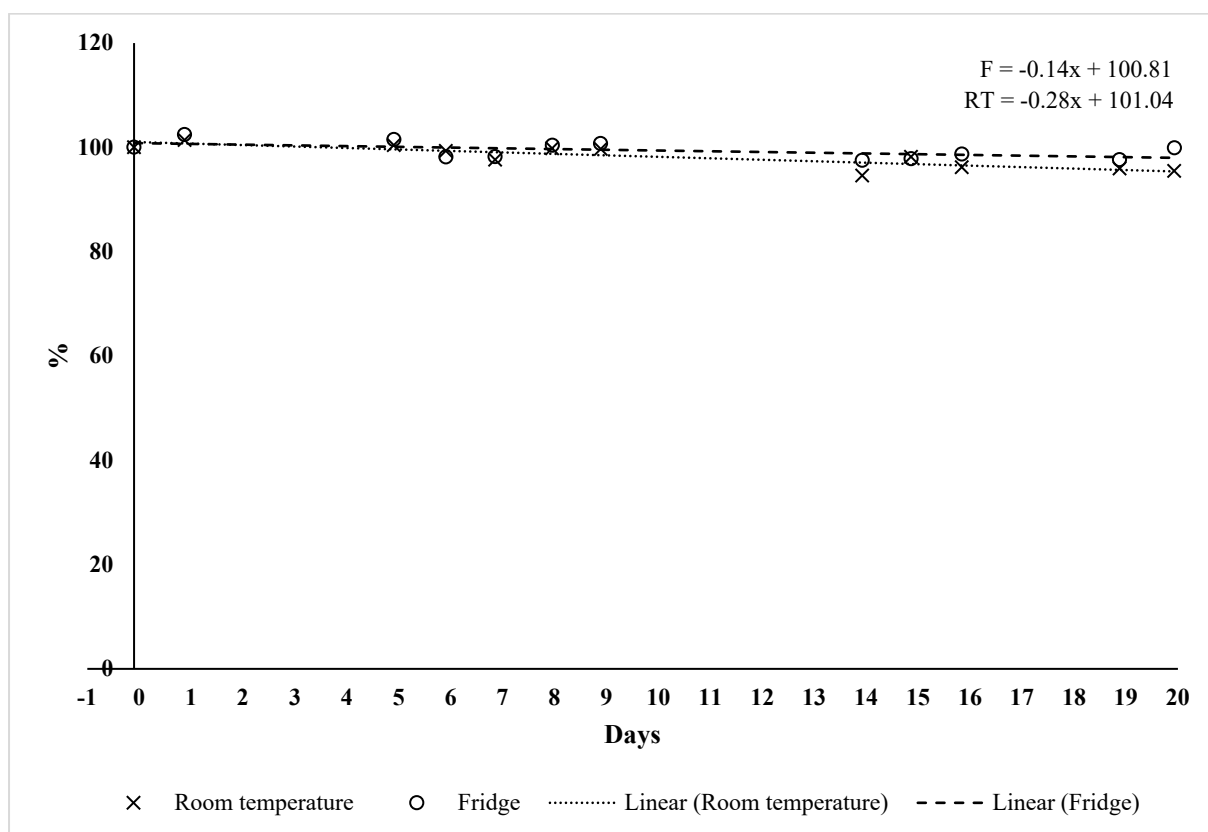

**Supplementary Figure S16:** Interday stability of **2d** in 1:1 DMSO and 10 mM HEPES-NaOH pH 7.5 with 150 mM NaCl.



## HTRF assay binding curves

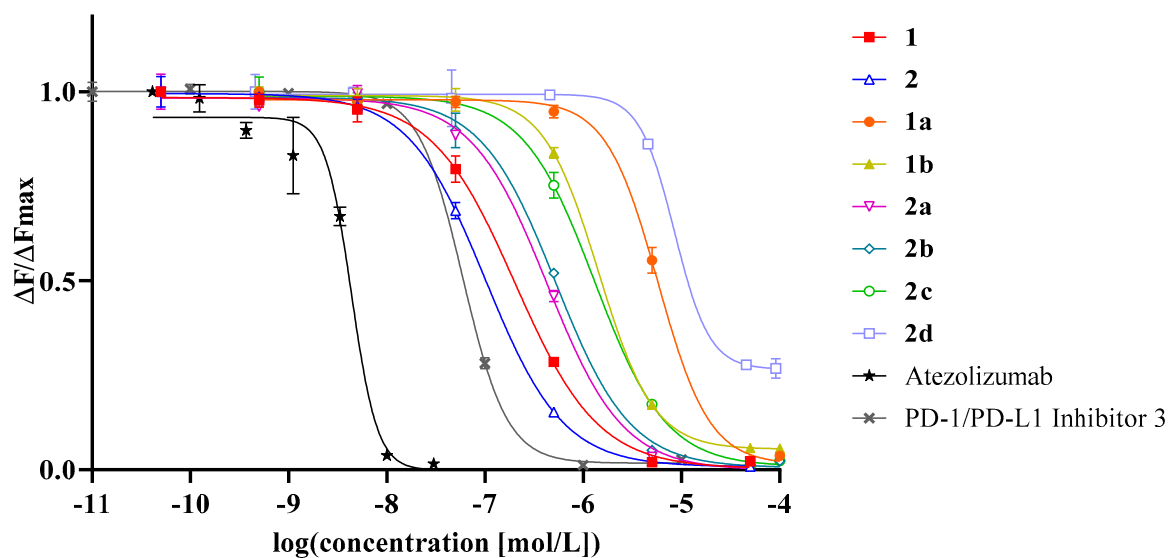

## Spearman's rank correlation coefficient

Supplementary Table S2: Spearman's rank correlation coefficient of physico-chemical properties, ligand docking parameters and measured HTRF IC<sub>50</sub> values. \*p < 0.05

| Spearman's $\rho$                               | clogP  | tPSA [Å <sup>2</sup> ] | logD  | $\mu$ HPLC logP <sup>pH 7.4</sup> <sub>OW</sub> | Binding Affinity Score | Affinity [kcal/mol] | IC <sub>50</sub> |
|-------------------------------------------------|--------|------------------------|-------|-------------------------------------------------|------------------------|---------------------|------------------|
| clogP                                           | 1      |                        |       |                                                 |                        |                     |                  |
| tPSA [Å <sup>2</sup> ]                          | -0.51  | 1                      |       |                                                 |                        |                     |                  |
| logD                                            | 0.95*  | -0.65                  | 1     |                                                 |                        |                     |                  |
| $\mu$ HPLC logP <sup>pH 7.4</sup> <sub>OW</sub> | 0.95*  | -0.65                  | 1     | 1                                               |                        |                     |                  |
| Binding Affinity Score                          | -0.74* | 0.36                   | -0.60 | -0.60                                           | 1                      |                     |                  |
| Affinity [kcal/mol]                             | -0.71* | 0.01                   | -0.50 | -0.50                                           | 0.79*                  | 1                   |                  |
| IC <sub>50</sub>                                | 0.29   | 0.16                   | 0.31  | 0.31                                            | -0.52                  | -0.64               | 1                |

## Small-scale radiosynthesis

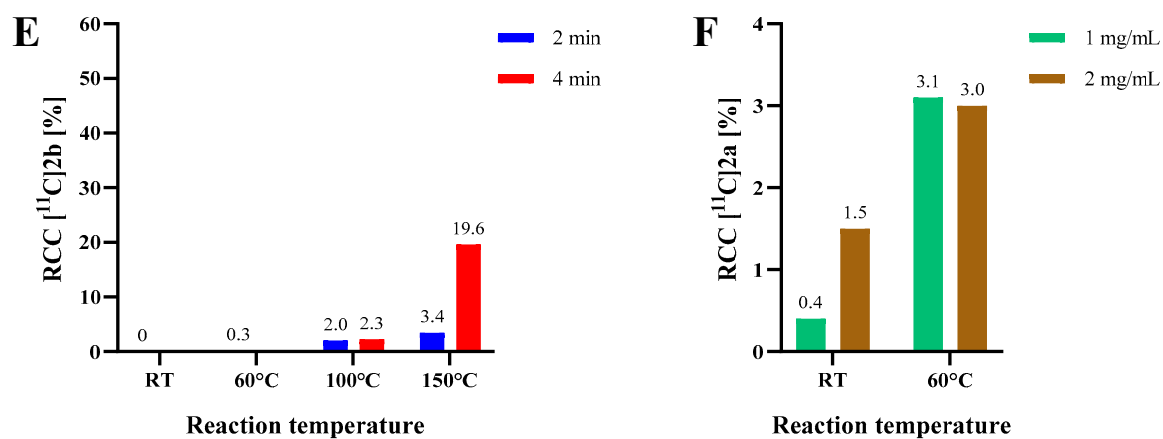

**Supplementary Figure S18:** Radiochemical conversion (RCC) of (E)  $[^{11}\text{C}]\text{2b}$  at various reaction conditions using  $[^{11}\text{C}]\text{CH}_3\text{I}$  and 2 mg/mL precursor without base. (F) Influence of precursor concentration for  $[^{11}\text{C}]\text{2a}$  at various temperatures using  $[^{11}\text{C}]\text{CH}_3\text{I}$  as methylating agent.

## Substance purity

**Supplementary Figure S199:** Methyl (*S*)-1-(2,6-dimethoxy-4-((2-methyl-[1,1'-biphenyl]-3-yl)methoxy)benzyl)piperidine-2-carboxylate (**1a**):

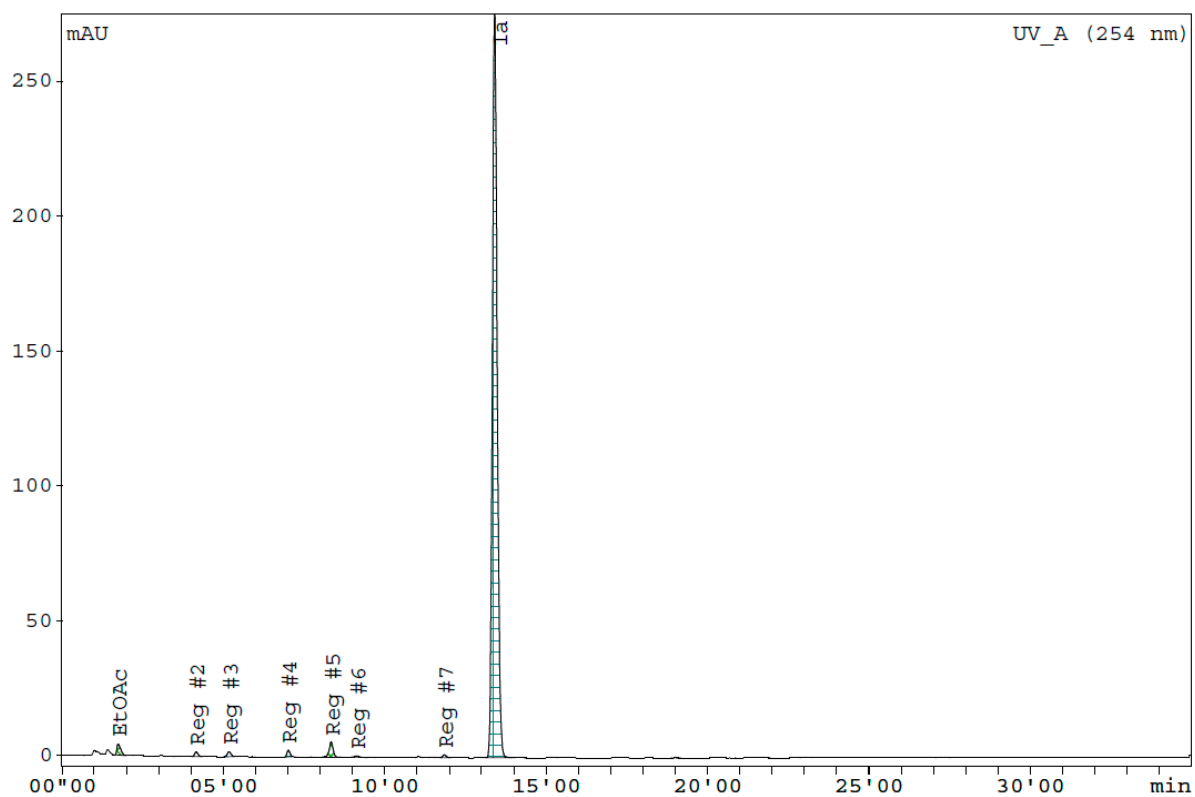

Integration UV\_A (254 nm)

| Substance  | R/T<br>s | Type | Area<br>mAU*s | %Area<br>% |
|------------|----------|------|---------------|------------|
| EtOAc      | 01'45    | BB   | 33,874        | 1,11       |
| Reg #2     | 04'10    | BB   | 11,923        | 0,39       |
| Reg #3     | 05'11    | BB   | 14,509        | 0,48       |
| Reg #4     | 07'01    | BB   | 16,781        | 0,55       |
| Reg #5     | 08'21    | BB   | 49,552        | 1,63       |
| Reg #6     | 09'08    | BB   | 4,420         | 0,15       |
| Reg #7     | 11'51    | BB   | 9,271         | 0,30       |
| 1a         | 13'24    | BB   | 2903,024      | 95,39      |
| Sum in ROI |          |      | 3043,355      | 100,00     |

**Supplementary Figure S20:** 2-Fluoroethyl (S)-1-(2,6-dimethoxy-4-((2-methyl-[1,1'-biphenyl]-3-yl)methoxy)benzyl)piperidine-2-carboxylate (**1b**):

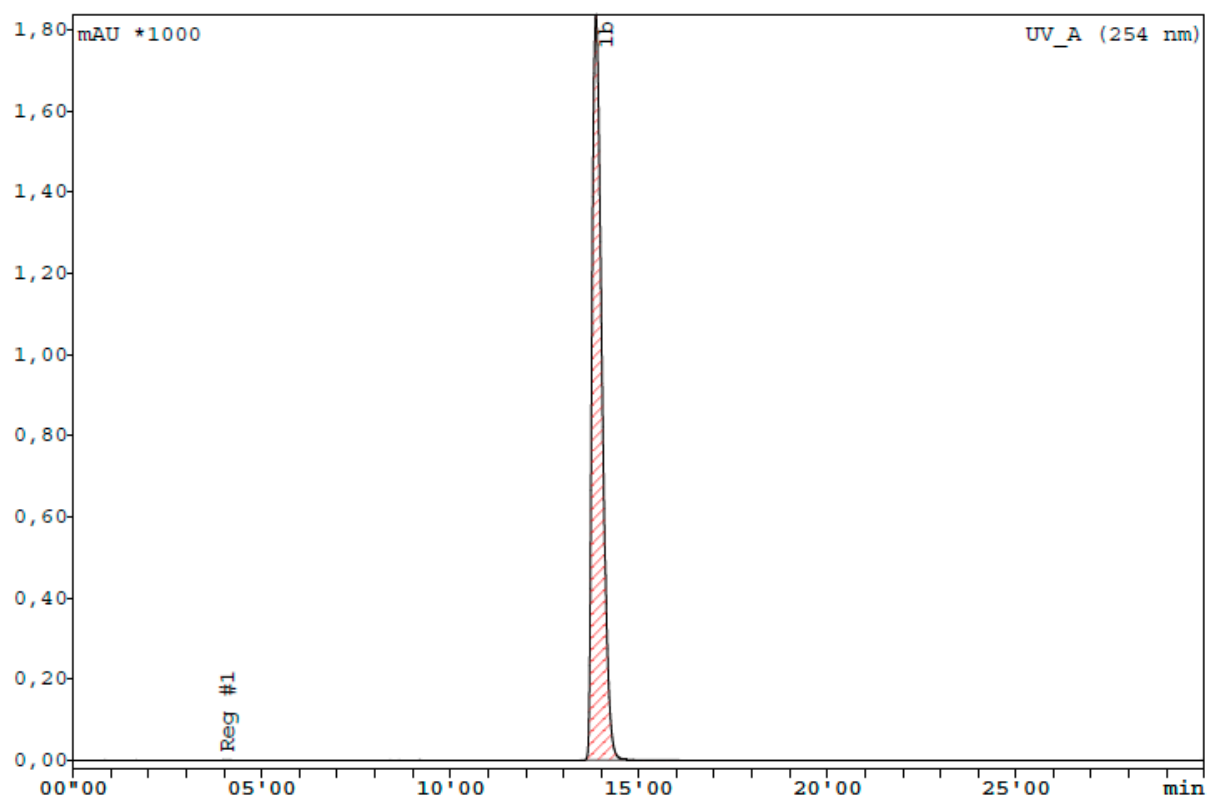

Integration UV\_A (254 nm)

| Substance  | R/T<br>s | Type | Area<br>mAU*s | %Area<br>% |
|------------|----------|------|---------------|------------|
| Reg #1     | 04'04    | BB   | 6,55          | 0,02       |
| 1b         | 13'52    | BB   | 33301,01      | 99,98      |
| Sum in ROI |          |      | 33307,56      | 100,00     |

**Supplementary Figure S21:** *N*-(2-(((2-methoxy-6-((2-methyl-[1,1'-biphenyl]-3-yl)methoxy)pyridin-3-yl)methyl)(methylamino)ethyl)acetamide (**2a**):

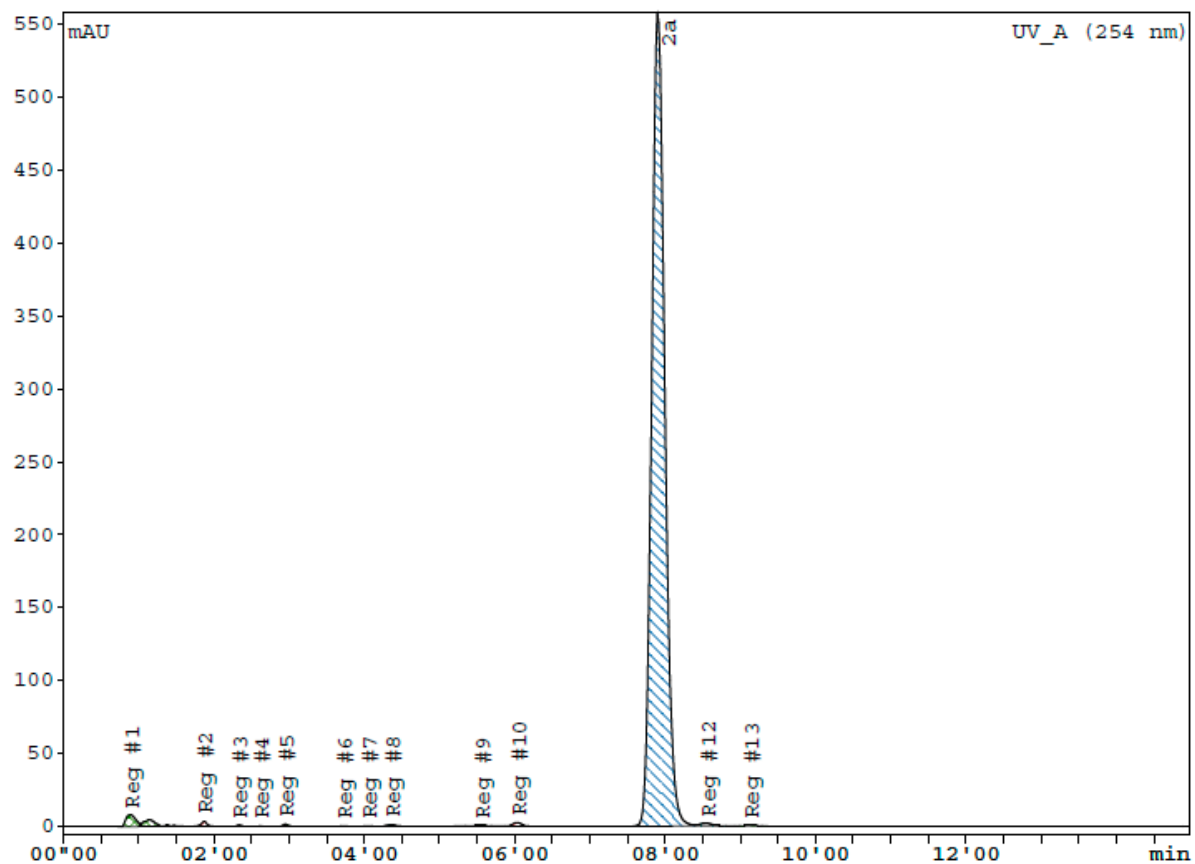

Integration UV\_A (254 nm)

| Substance  | R/T<br>s | Type | Area<br>mAU*s | %Area<br>% |
|------------|----------|------|---------------|------------|
| Reg #1     | 53"00    | BB   | 124,886       | 1,79       |
| Reg #2     | 01'52    | BB   | 16,005        | 0,23       |
| Reg #3     | 02'20    | BB   | 3,259         | 0,05       |
| Reg #4     | 02'37    | BB   | 0,879         | 0,01       |
| Reg #5     | 02'57    | BB   | 6,563         | 0,09       |
| Reg #6     | 03'43    | BD   | 1,717         | 0,02       |
| Reg #7     | 04'03    | DD   | 1,991         | 0,03       |
| Reg #8     | 04'21    | DB   | 10,599        | 0,15       |
| Reg #9     | 05'33    | BD   | 14,728        | 0,21       |
| Reg #10    | 06'02    | DB   | 21,166        | 0,30       |
| 2a         | 07'54    | BD   | 6755,576      | 96,68      |
| Reg #12    | 08'33    | DB   | 24,844        | 0,36       |
| Reg #13    | 09'08    | BB   | 5,392         | 0,08       |
| Sum in ROI |          |      | 6987,605      | 100,00     |

**Supplementary Figure S22:** *N*-(2-(((2-methoxy-6-((2-methyl-[1,1'-biphenyl]-3-yl)methoxy)pyridin-3-yl)methyl)amino)ethyl)-*N*-methylacetamide (**2b**):

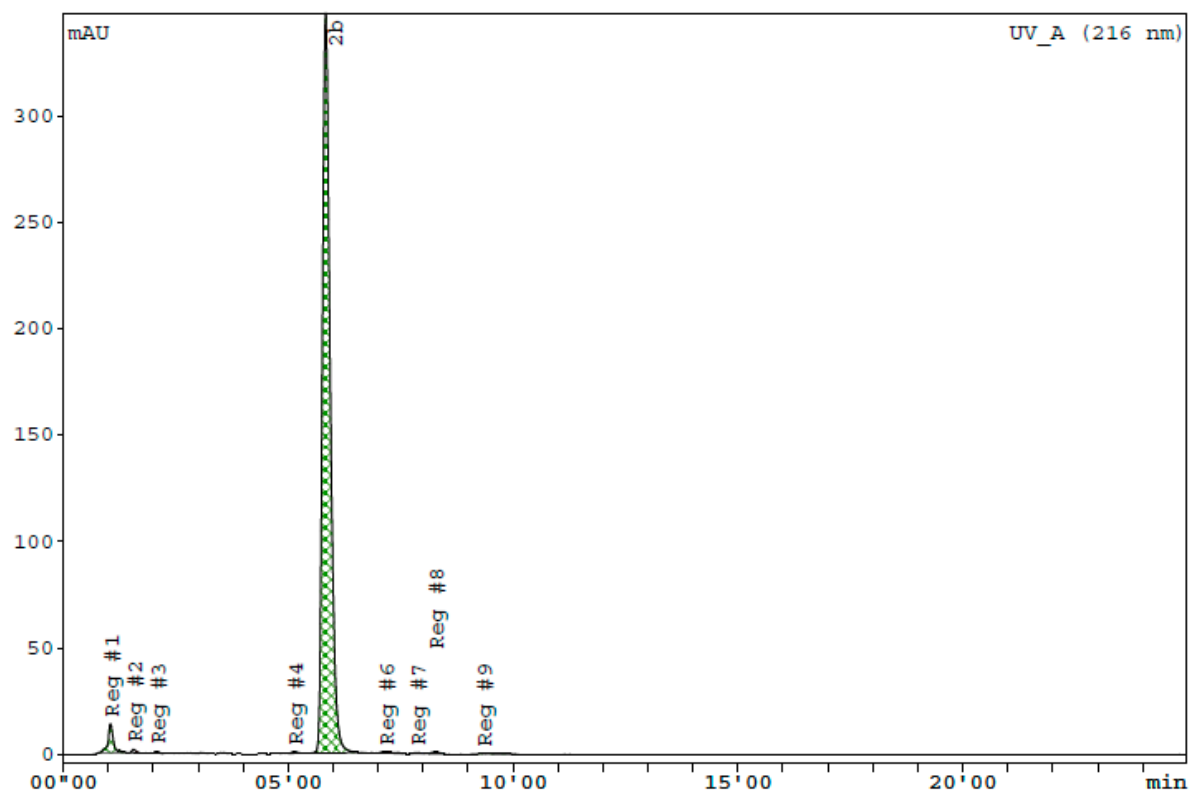

Integration UV\_A (216 nm)

| Substance  | R/T<br>s | Type | Area<br>mAU*s | %Area<br>% |
|------------|----------|------|---------------|------------|
| Reg #1     | 01'03    | DB   | 113,503       | 2,59       |
| Reg #2     | 01'34    | BB   | 9,495         | 0,22       |
| Reg #3     | 02'04    | BB   | 4,213         | 0,10       |
| Reg #4     | 05'09    | BB   | 6,576         | 0,15       |
| 2b         | 05'50    | BB   | 4205,578      | 96,02      |
| Reg #6     | 07'09    | BB   | 13,513        | 0,31       |
| Reg #7     | 07'52    | BB   | 5,537         | 0,13       |
| Reg #8     | 08'16    | BB   | 9,982         | 0,23       |
| Reg #9     | 09'21    | BB   | 11,350        | 0,26       |
| Sum in ROI |          |      | 4379,747      | 100,00     |



**Supplementary Figure S23:** *N*-(2-(((2-methoxy-6-((2-methyl-[1,1'-biphenyl]-3-yl)methoxy)pyridin-3-yl)methyl)(methylamino)ethyl)-*N*-methylacetamide (**2c**):

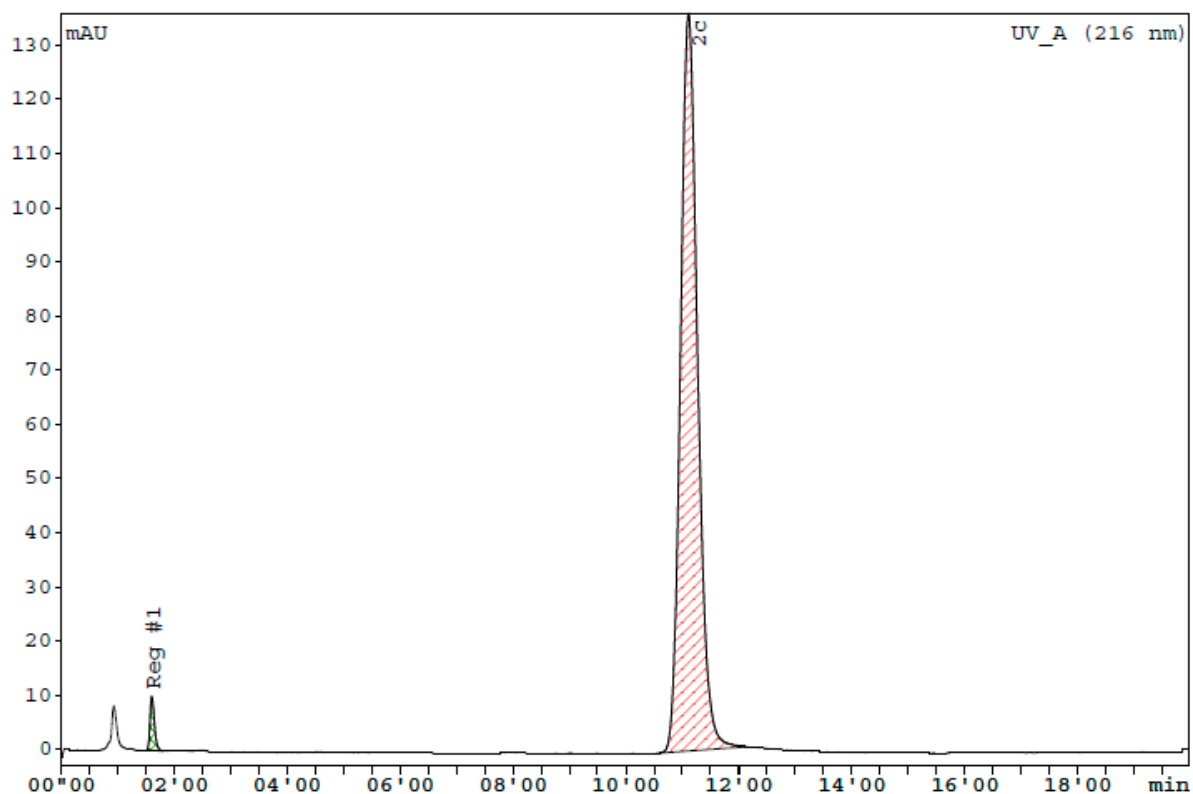

Integration UV\_A (216 nm)

| Substance  | R/T<br>s | Type | Area<br>mAU*s | %Area<br>% |
|------------|----------|------|---------------|------------|
| Reg #1     | 01'37    | BB   | 55,517        | 1,89       |
| 2c         | 11'07    | BB   | 2882,809      | 98,11      |
| Sum in ROI |          |      | 2938,326      | 100,00     |

**Supplementary Figure S24:** 2-fluoroethyl (2-acetamidoethyl)((2-methoxy-6-((2-methyl-[1,1'-biphenyl]-3-yl)methoxy)pyridin-3-yl)methyl)carbamate (**2d**):

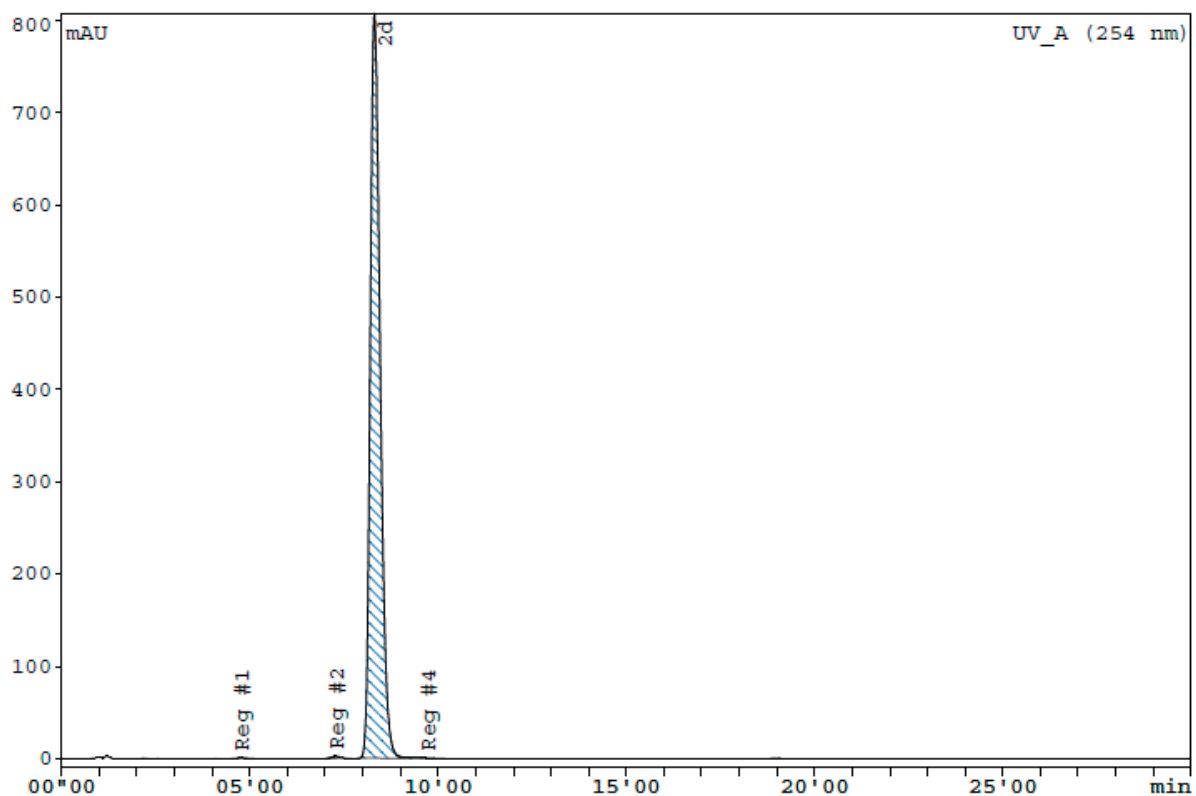

Integration UV\_A (254 nm)

| Substance  | R/T<br>s | Type | Area<br>mAU*s | %Area<br>% |
|------------|----------|------|---------------|------------|
| Reg #1     | 04'46    | BB   | 11,58         | 0,08       |
| Reg #2     | 07'17    | BB   | 31,76         | 0,21       |
| 2d         | 08'19    | BD   | 14897,28      | 99,55      |
| Reg #4     | 09'42    | DB   | 23,59         | 0,16       |
| Sum in ROI |          |      | 14964,21      | 100,00     |

## Nuclear magnetic resonance spectroscopy

**Supplementary Figure S25:** Methyl (*S*)-1-(2,6-dimethoxy-4-((2-methyl-[1,1'-biphenyl]-3-yl)methoxy)benzyl)piperidine-2-carboxylate (**1a**):

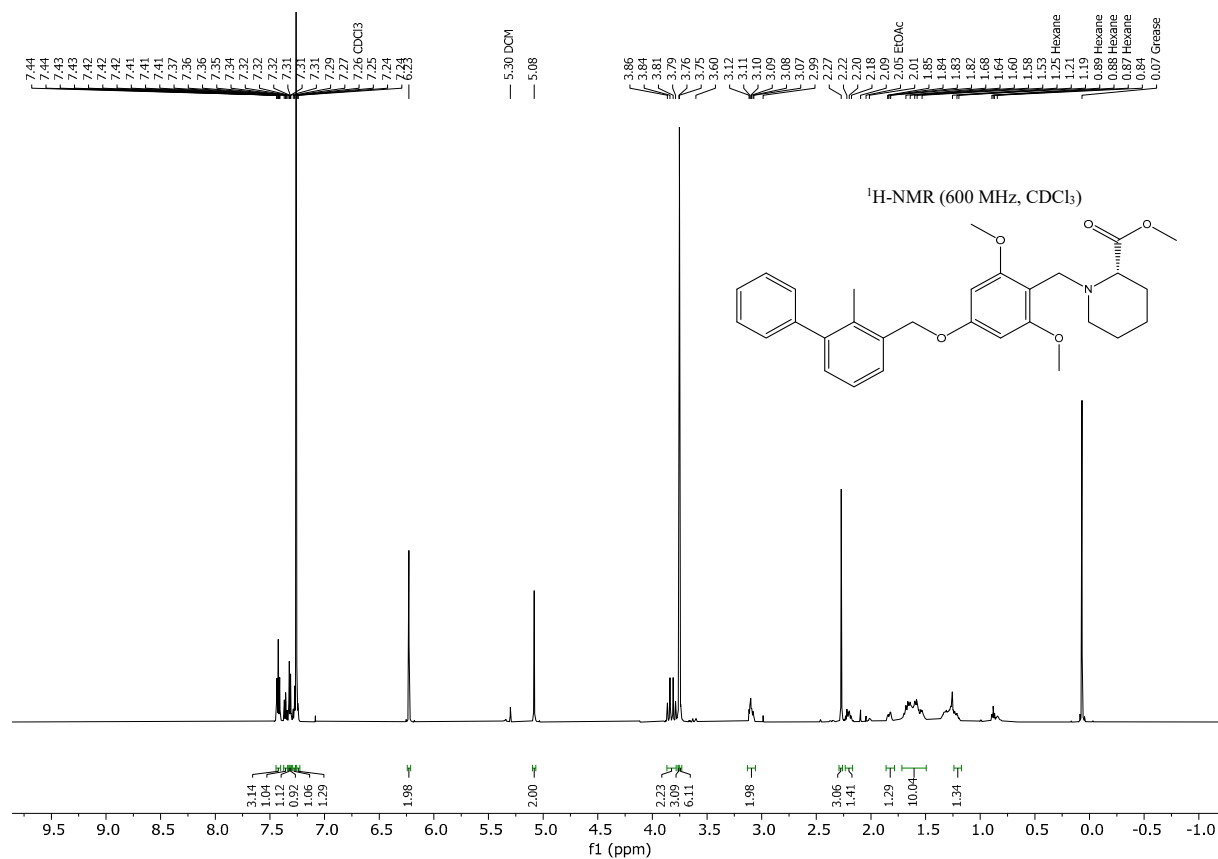

<sup>1</sup>H-NMR (600 MHz, CDCl<sub>3</sub>): δ 7.44 – 7.41 (m, 3H), 7.37 – 7.24 (m, 5H), 6.23 (s, 2H), 5.08 (s, 2H), 3.86 – 3.79 (m, 2H), 3.76 (s, 3H), 3.75 (s, 6H), 3.12 – 3.07 (m, 2H), 2.27 (s, 3H), 2.22 – 2.18 (m, 1H), 1.85 – 1.82 (m, 1H), 1.68 – 1.53 (m, 4H), 1.25 – 1.19 (m, 2H).

**Supplementary Figure S26:** Methyl (*S*)-1-(2,6-dimethoxy-4-((2-methyl-[1,1'-biphenyl]-3-yl)methoxy)benzyl)piperidine-2-carboxylate (**1a**):

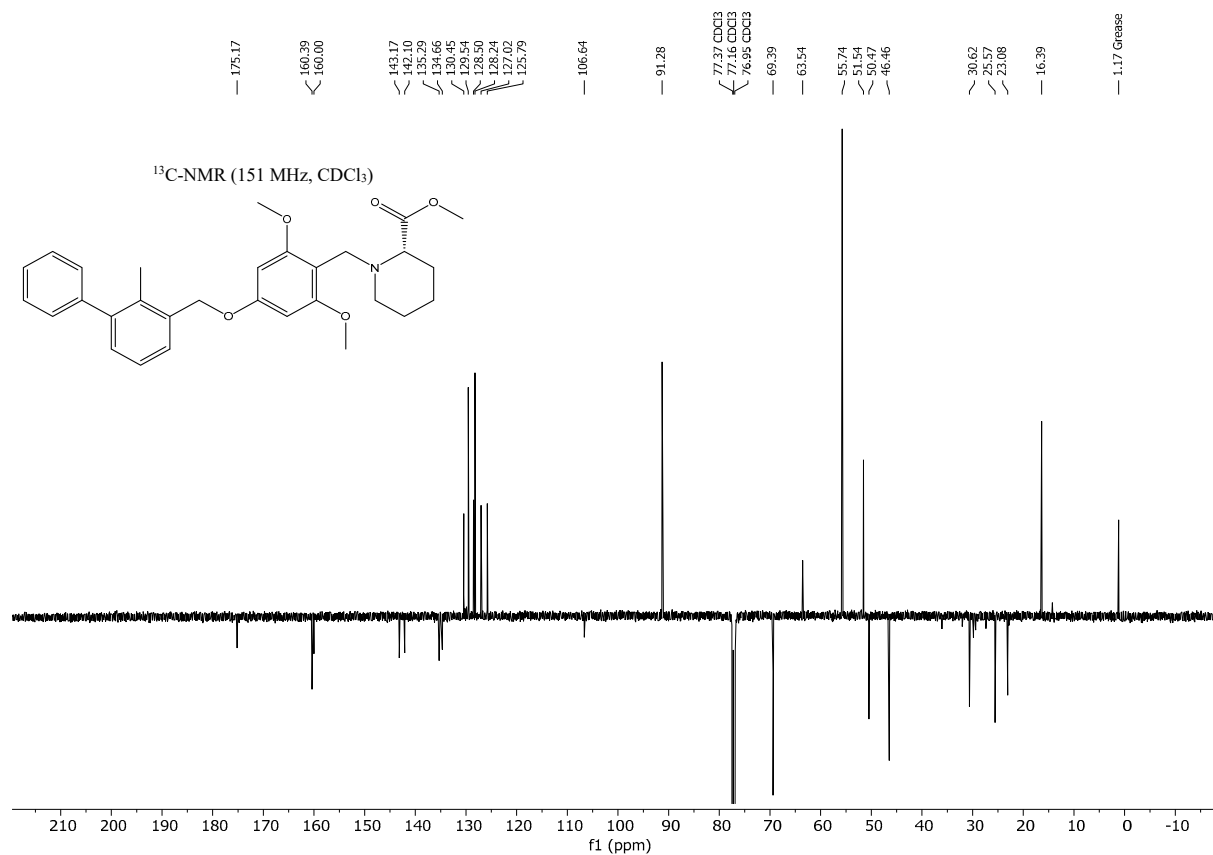

<sup>13</sup>C-NMR (151 MHz, CDCl<sub>3</sub>): δ 175.17, 160.39, 160.00, 143.17, 142.10, 135.29, 134.66, 130.45, 129.54, 128.50, 128.24, 127.02, 125.79, 106.64, 91.28, 69.39, 63.54, 55.74, 51.54, 50.47, 46.46, 30.62, 25.57, 23.08, 16.39.

**Supplementary Figure S27:** Methyl (*S*)-1-(2,6-dimethoxy-4-((2-methyl-[1,1'-biphenyl]-3-yl)methoxy)benzyl)piperidine-2-carboxylate (**1a**):

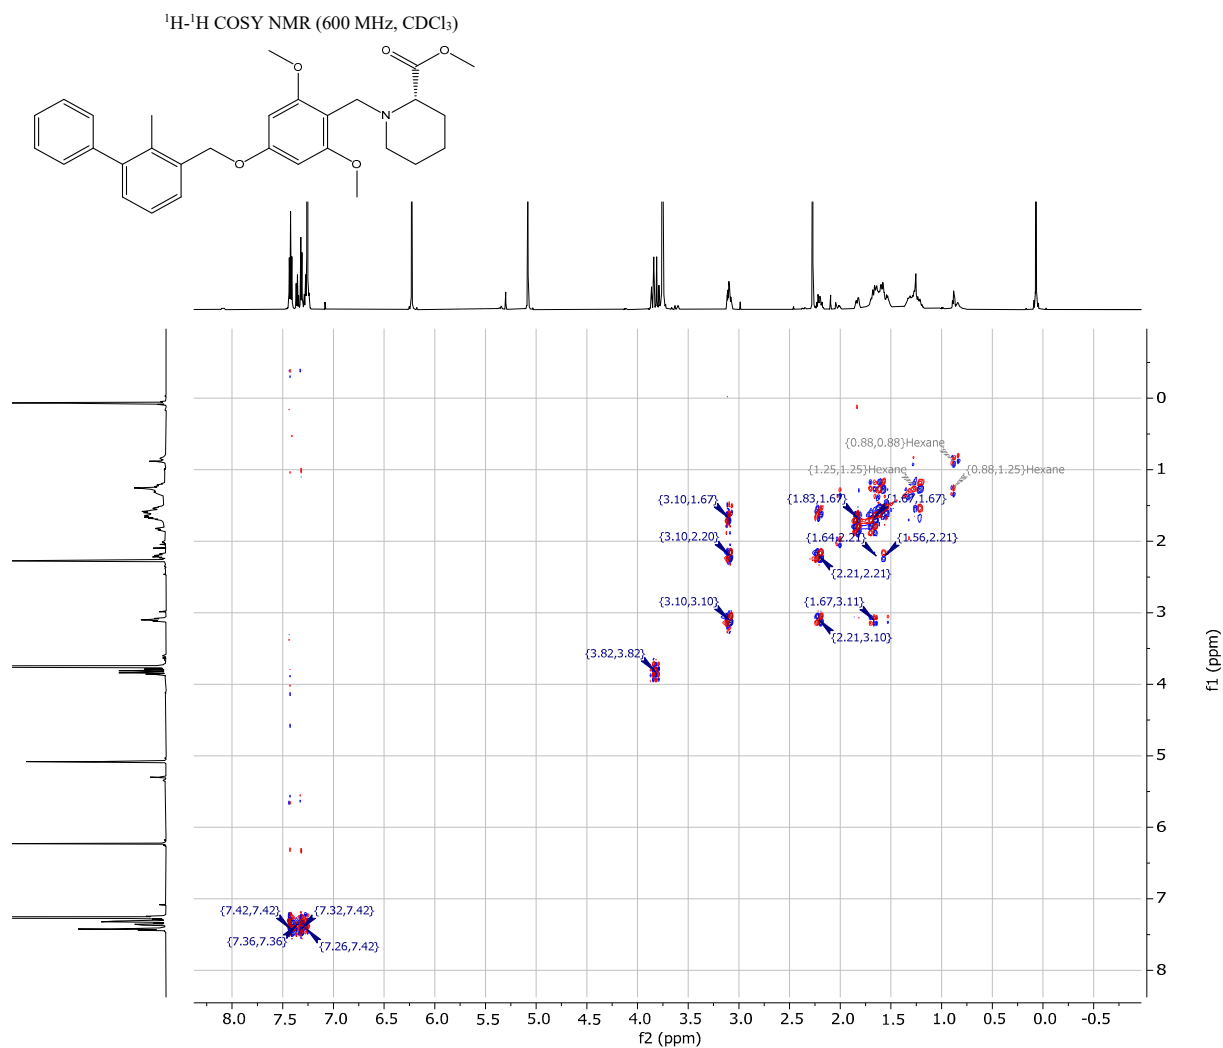

<sup>1</sup>H-NMR (600 MHz, CDCl<sub>3</sub>): δ 7.42, 7.42, 7.42, 7.36, 7.36, 7.32, 7.26, 7.26, 3.82, 3.11, 3.10, 3.10, 2.21, 2.21, 2.21, 2.20, 1.83, 1.83, 1.67, 1.67, 1.67, 1.64, 1.59, 1.59, 1.56, 1.22, 1.21, 1.21.

<sup>1</sup>H-NMR (600 MHz, CDCl<sub>3</sub>): δ 7.42, 7.42, 7.42, 7.36, 7.32, 7.32, 7.26, 7.26, 3.82, 3.10, 3.10, 3.10, 2.21, 2.21, 2.21, 2.21, 1.83, 1.83, 1.67, 1.67, 1.67, 1.67, 1.64, 1.59, 1.59, 1.56, 1.21, 1.21.

**Supplementary Figure S28:** Methyl (S)-1-(2,6-dimethoxy-4-((2-methyl-[1,1'-biphenyl]-3-yl)methoxy)benzyl)piperidine-2-carboxylate (**1a**):

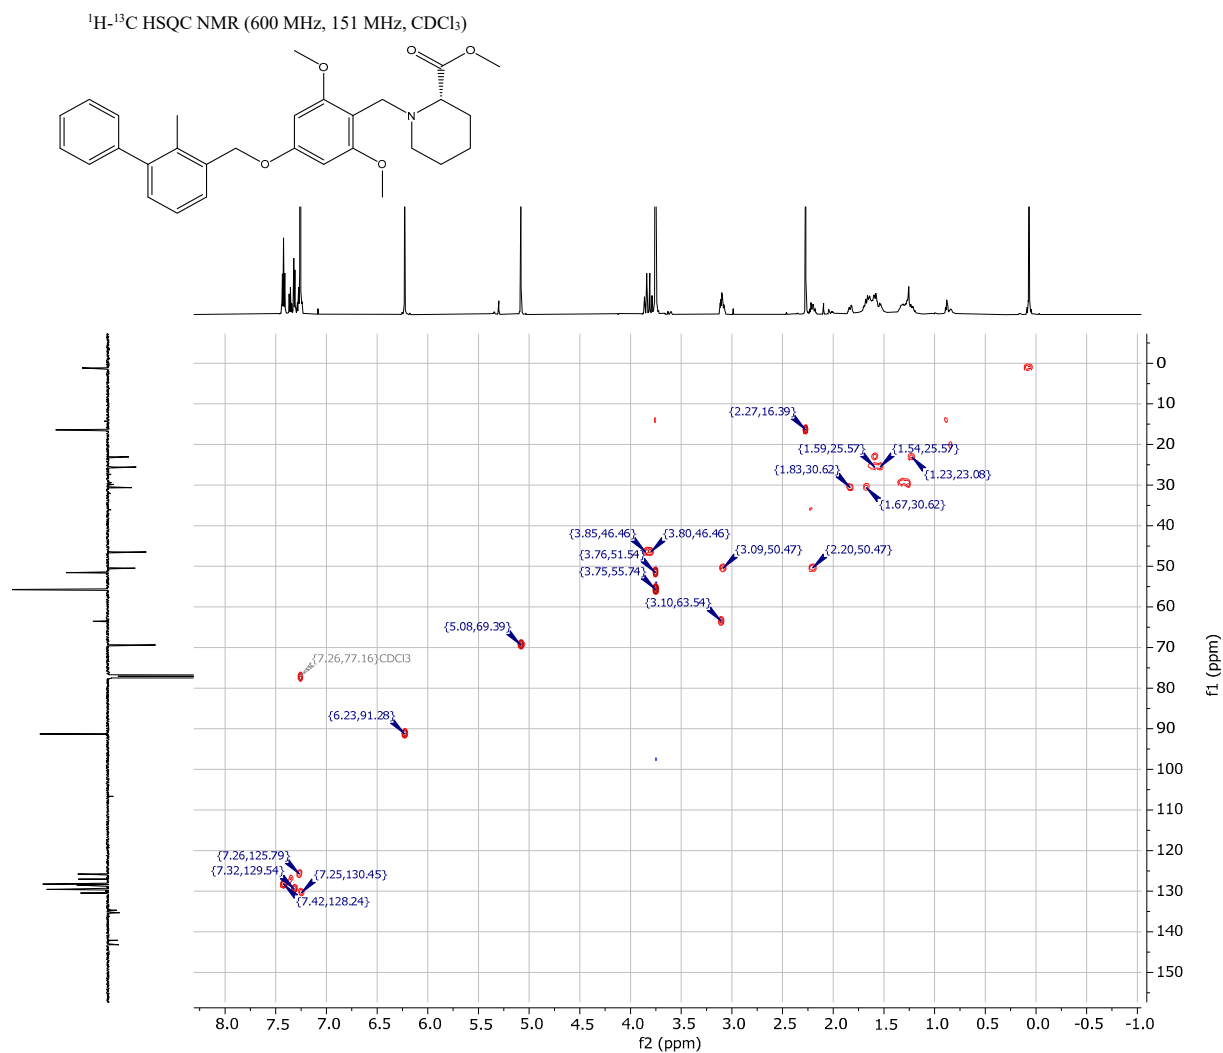



**Supplementary Figure S29:** 2-Fluoroethyl (*S*)-1-(2,6-dimethoxy-4-((2-methyl-[1,1'-biphenyl]-3-yl)methoxy)benzyl)piperidine-2-carboxylate (**1b**):

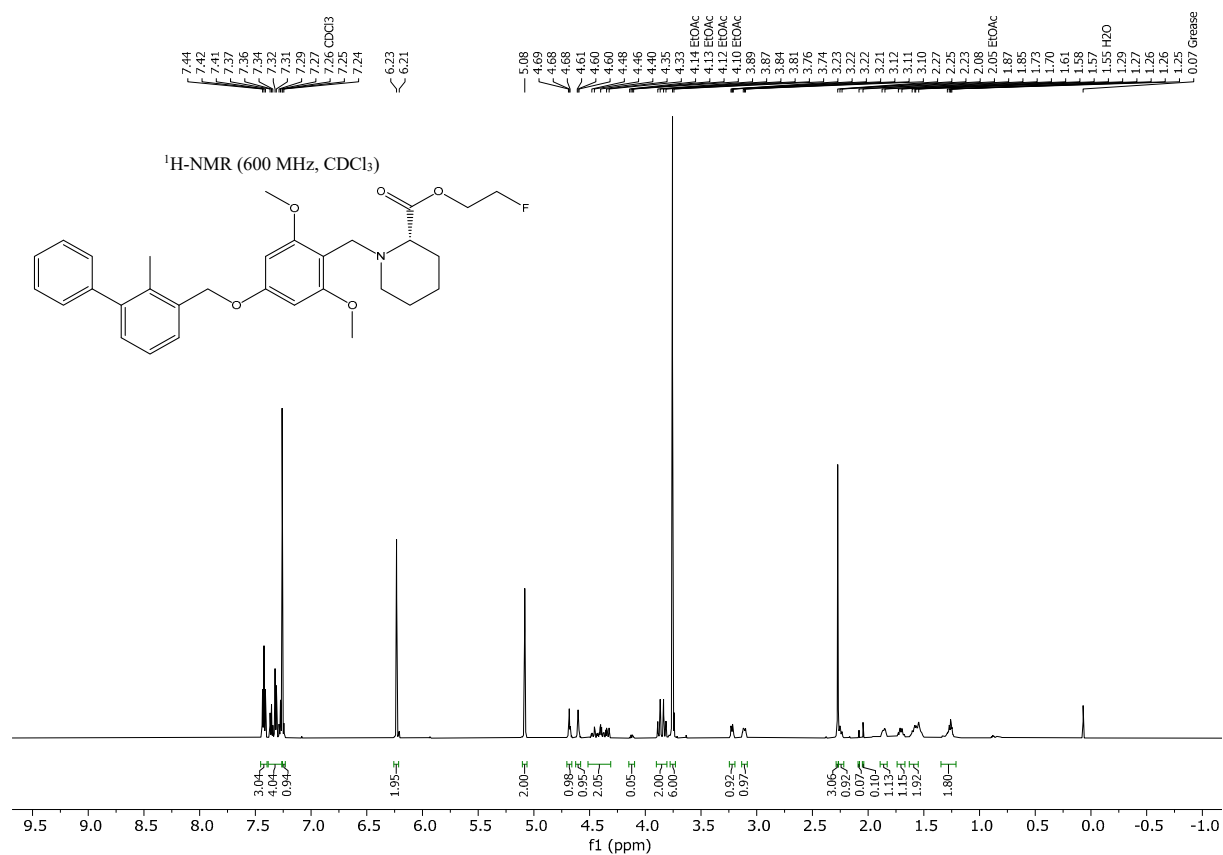

<sup>1</sup>H-NMR (600 MHz, CDCl<sub>3</sub>): δ 7.44 – 7.41 (m, 3H), 7.37 – 7.24 (m, 5H), 6.23 (s, 2H), 5.08 (s, 2H), 4.69 – 4.60 (m, *J* = 47.4 Hz, 2H), 4.48 – 4.33 (m, 2H), 3.89 – 3.81 (m, 2H), 3.76 (s, 6H), 3.22 (dd, *J* = 4.4 Hz, *J* = 3.9 Hz, 1H), 3.12 – 3.10 (m, 1H), 2.27 (s, 3H), 2.25 – 2.23 (m, 1H), 1.87 – 1.85 (m, 1H), 1.73 – 1.70 (m, 1H), 1.61 – 1.57 (m, 2H), 1.29 – 1.25 (m, 2H).

**Supplementary Figure S30:** 2-Fluoroethyl (*S*)-1-(2,6-dimethoxy-4-((2-methyl-[1,1'-biphenyl]-3-yl)methoxy)benzyl)piperidine-2-carboxylate (**1b**):

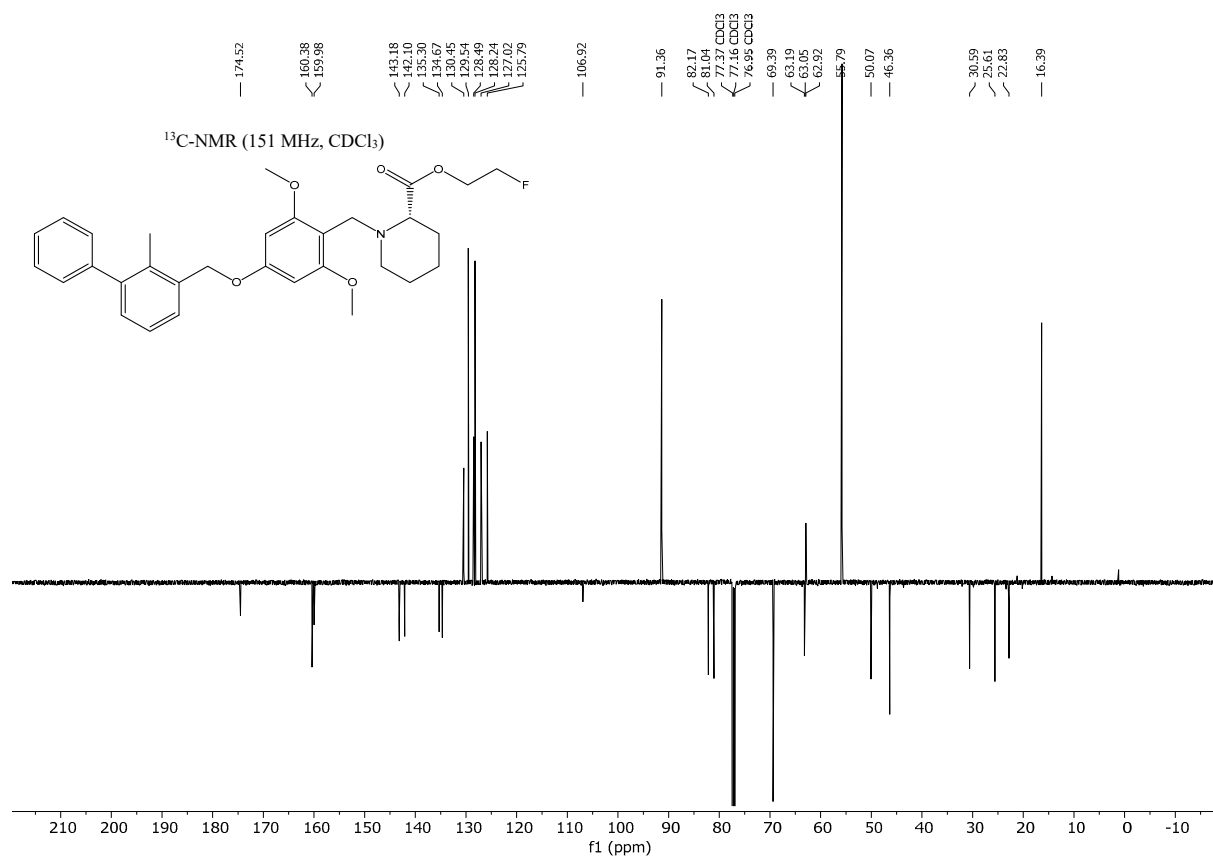

<sup>13</sup>C-NMR (151 MHz, CDCl<sub>3</sub>): δ 174.52, 160.38, 159.89, 143.18, 142.10, 135.30, 134.67, 130.45, 129.54, 128.49, 128.24, 127.02, 125.79, 106.92, 91.36, 81.61 (d, *J* = 170 Hz), 69.39, 63.12 (d, *J* = 20 Hz), 62.92, 55.81, 55.79, 50.07, 46.36, 30.59, 25.61, 22.83, 16.39.

**Supplementary Figure S31:** 2-Fluoroethyl (*S*)-1-(2,6-dimethoxy-4-((2-methyl-[1,1'-biphenyl]-3-yl)methoxy)benzyl)piperidine-2-carboxylate (**1b**):

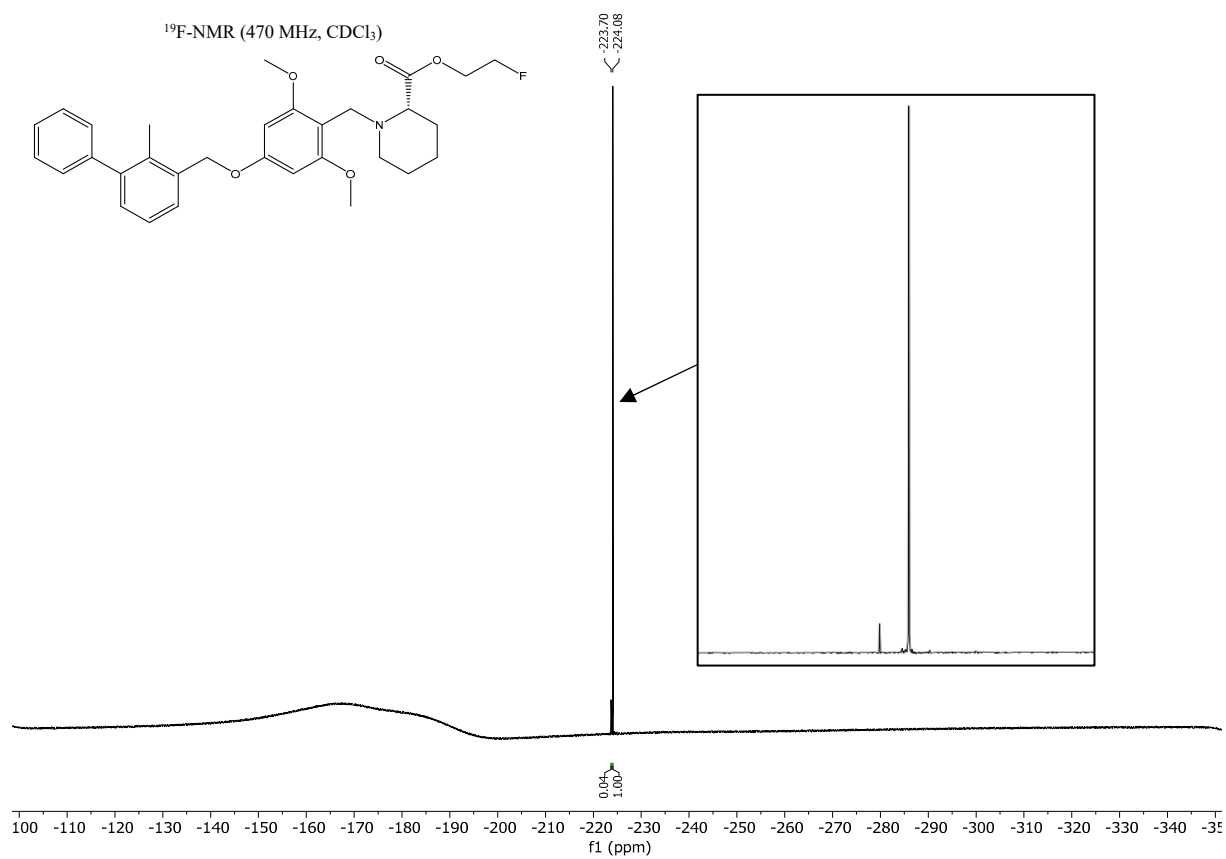

<sup>19</sup>F-<sup>1</sup>H NMR (470 MHz, CDCl<sub>3</sub>): δ -224.08 (s, 1F).

**Supplementary Figure S32:** *N*-(2-(((2-methoxy-6-((2-methyl-[1,1'-biphenyl]-3-yl)methoxy)pyridin-3-yl)methyl)(methylamino)ethyl)acetamide (**2a**):

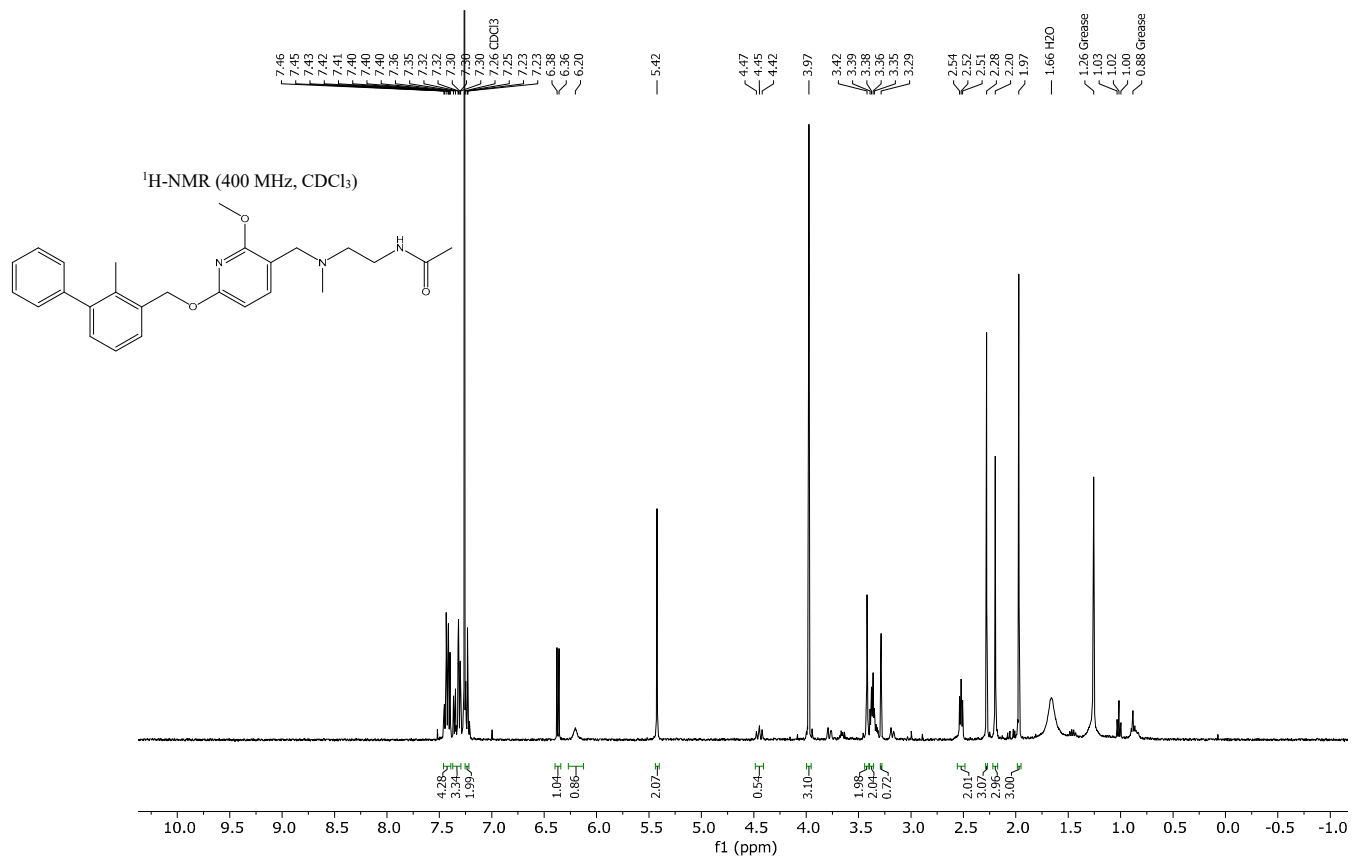

<sup>1</sup>H-NMR (400 MHz, CDCl<sub>3</sub>): δ 7.46 – 7.40 (m, 4H), 7.36 – 7.30 (m, 3H), 7.25 – 7.23 (m, 2H), 6.37 (d, *J* = 7.9 Hz, 1H), 6.20 (br s, 1H), 5.42 (s, 2H), 3.97 (s, 3H), 3.42 (s, 2H), 3.37 (q, *J* = 5.6 Hz, 2H), 2.52 (t, *J* = 5.6 Hz, 2H), 2.28 (s, 3H), 2.20 (s, 3H), 1.97 (s, 3H).

**Supplementary Figure S33:** *N*-(2-(((2-methoxy-6-((2-methyl-[1,1'-biphenyl]-3-yl)methoxy)pyridin-3-yl)methyl)amino)ethyl)-*N*-methylacetamide (**2b**):

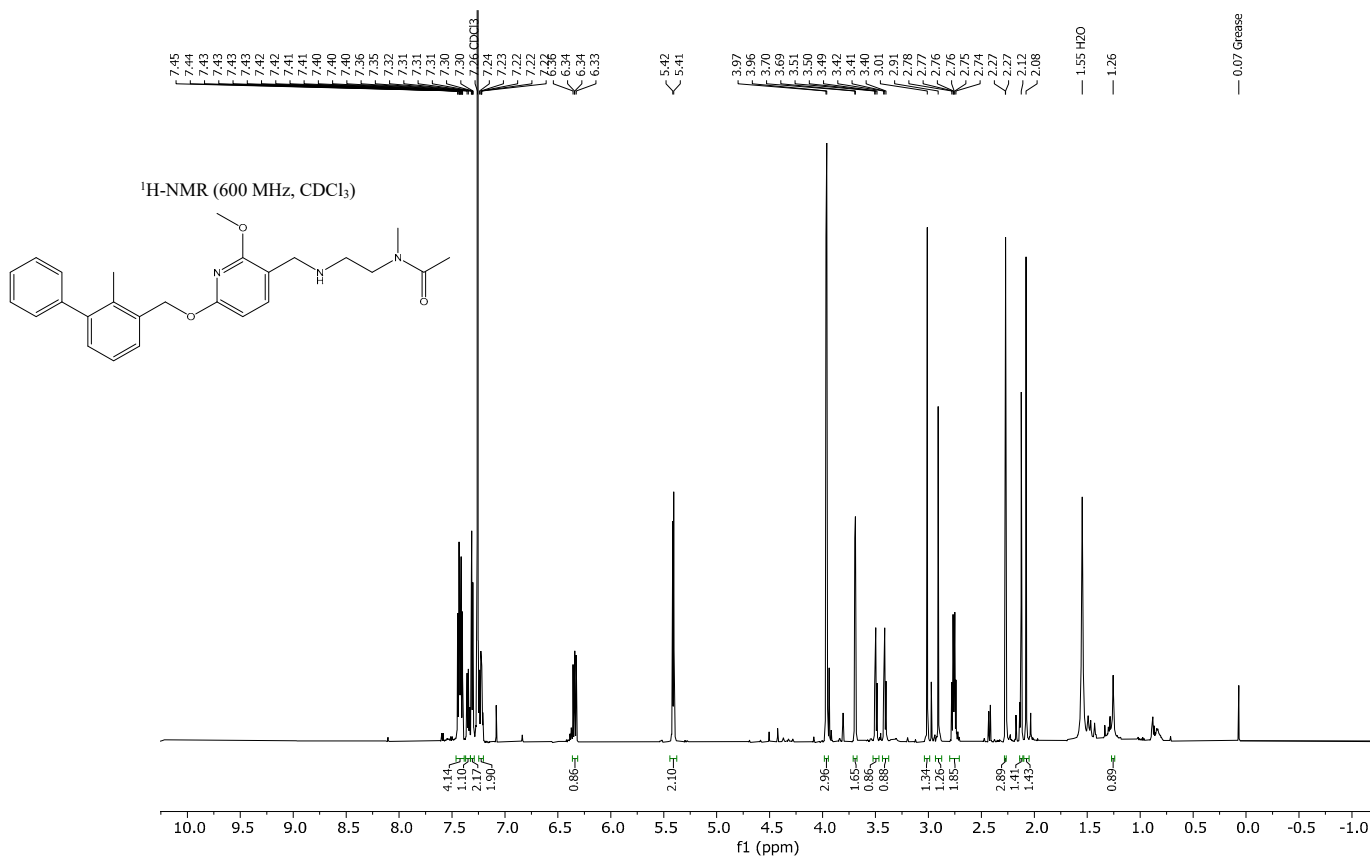

<sup>1</sup>H-NMR (600 MHz, CDCl<sub>3</sub>): δ 7.45 – 7.40 (m, 4H), 7.36 – 7.33 (m, 1H), 7.32 – 7.30 (m, 2H), 7.24 – 7.21 (m, 2H), 6.35 and 6.33 (d\*, *J* = 7.9 Hz, 1H), 5.42 and 5.41 (s\*, 2H), 3.97 and 3.96 (s\*, 3H), 3.70 and 3.69 (s\*, 2H), 3.50 and 3.41 (t\*, *J* = 6.7 Hz, 2H), 3.01 and 2.91 (s, 3H), 2.77 and 2.75 (t\*, *J* = 6.7 Hz, 2H), 2.27 (s\*, 3H), 2.12 and 2.08 (s\*, 3H).

Note: Certain peaks are split due to the presence of amide rotamers and are denoted with an asterisk.

**Supplementary Figure S34:** *N*-(2-(((2-methoxy-6-((2-methyl-[1,1'-biphenyl]-3-yl)methoxy)pyridin-3-yl)methyl)(methylamino)ethyl)-*N*-methylacetamide (**2c**):

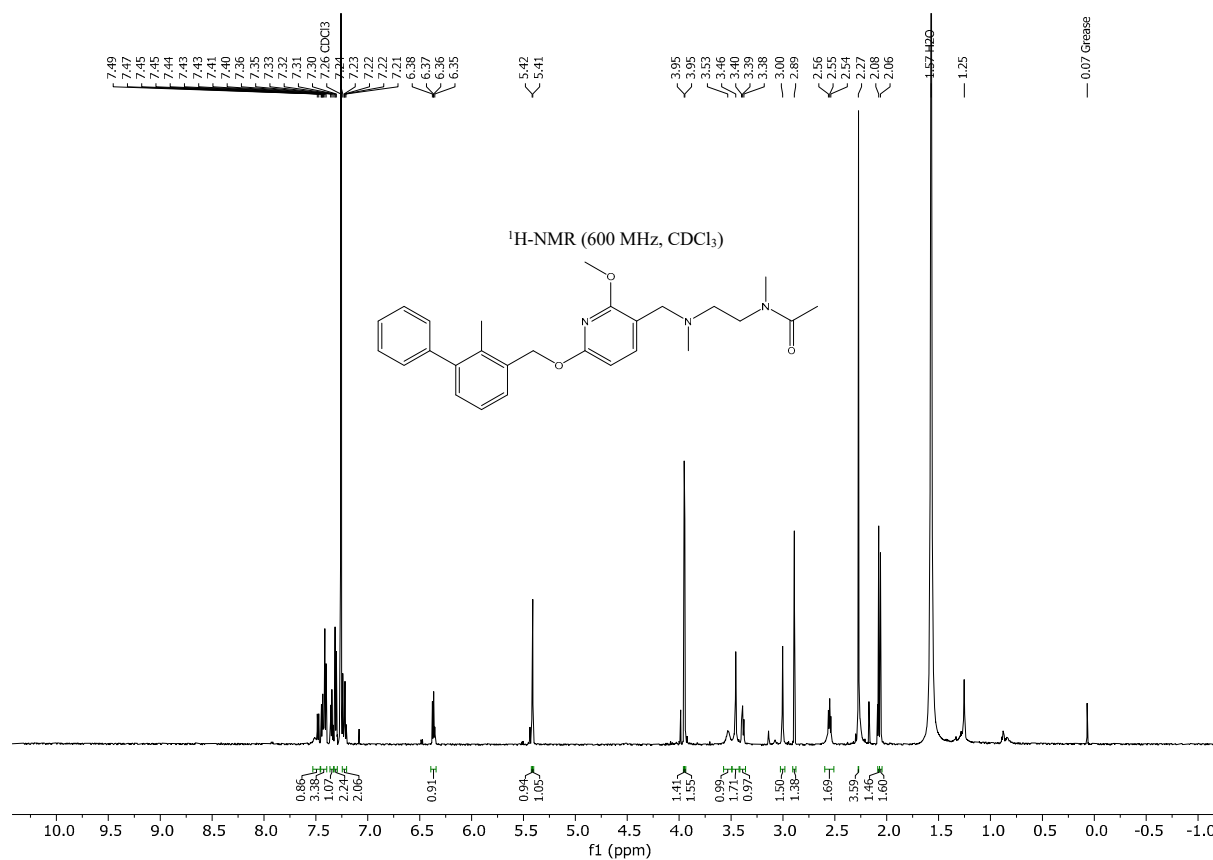

<sup>1</sup>H-NMR (600 MHz, CDCl<sub>3</sub>):  $\delta$  7.49 – 7.40 (m, 4H), 7.36 – 7.30 (m, 3H), 7.24 – 7.21 (m, 2H), 6.37 and 6.36 (d\*,  $J = 7.9$  Hz, 1H), 5.42 and 5.41 (s\*, 2H), 3.95 and 3.95 (s\*, 3H), 3.53 and 3.39 (m and t\*,  $J = 7.2$  Hz, 2H), 3.46 (s, 2H), 3.00 and 2.89 (s, 3H), 2.55 (t,  $J = 7.2$  Hz, 2H), 2.27 (s, 3H), 2.08 and 2.06 (s\*, 3H).

Note: Certain peaks are split due to the presence of amide rotamers and are denoted with an asterisk.



[illegible]

33

**Supplementary Figure S36:** 2-fluoroethyl (2-acetamidoethyl)((2-methoxy-6-((2-methyl-[1,1'-biphenyl]-3-yl)methoxy)pyridin-3-yl)methyl)carbamate (**2d**):

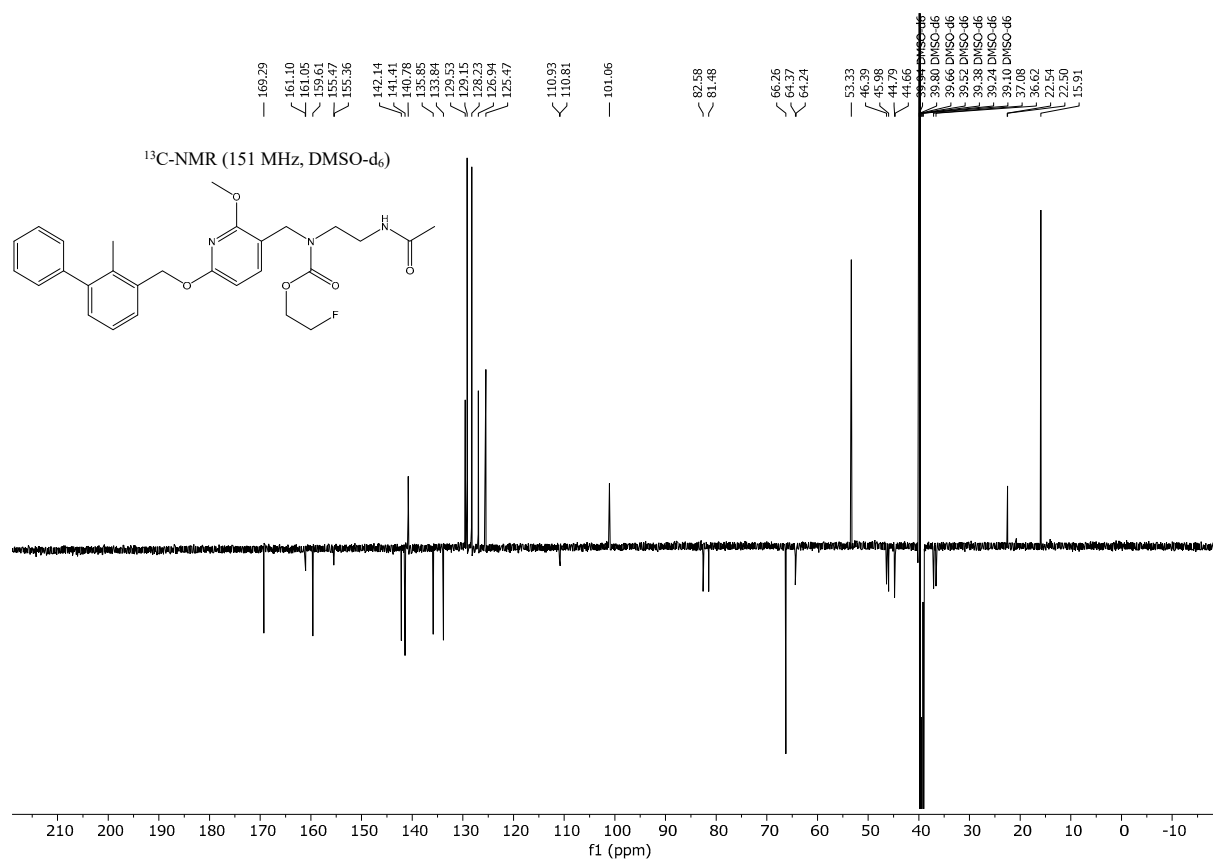

<sup>13</sup>C-NMR (151 MHz, DMSO-d<sub>6</sub>):  $\delta$  169.29, 161.07 ( $J = 7$  Hz), 159.61, 155.42 ( $J = 16$  Hz), 142.14, 141.41, 140.78, 135.85, 133.84, 129.53, 129.15, 128.23, 126.94, 125.47, 110.87 ( $J = 18$  Hz), 101.06, 82.03 ( $J = 166$  Hz), 66.26, 64.30 ( $J = 19$  Hz), 53.33, 46.19 ( $J = 61$  Hz), 44.72 ( $J = 20$  Hz), 36.85 ( $J = 69$  Hz), 22.52 ( $J = 7$  Hz), 15.91.

**Supplementary Figure S37:** 2-fluoroethyl (2-acetamidoethyl)((2-methoxy-6-((2-methyl-[1,1'-biphenyl]-3-yl)methoxy)pyridin-3-yl)methyl)carbamate (**2d**):

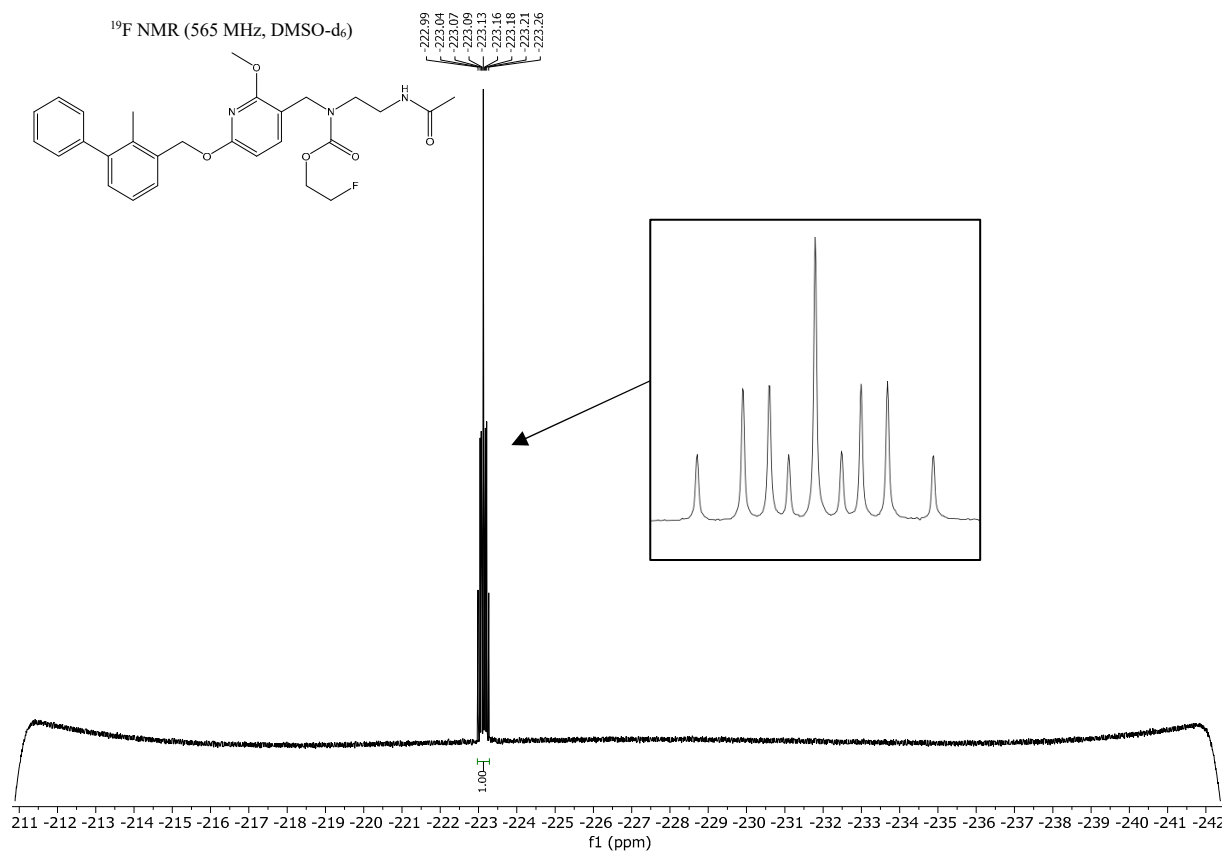

<sup>19</sup>F-NMR (565 MHz, DMSO-d<sub>6</sub>): δ -223.13 (tt,  $J = 48$  Hz,  $J = 30$  Hz, 1F).

**Supplementary Figure S38:** 2-fluoroethyl (2-acetamidoethyl)((2-methoxy-6-((2-methyl-[1,1'-biphenyl]-3-yl)methoxy)pyridin-3-yl)methyl)carbamate (**2d**):

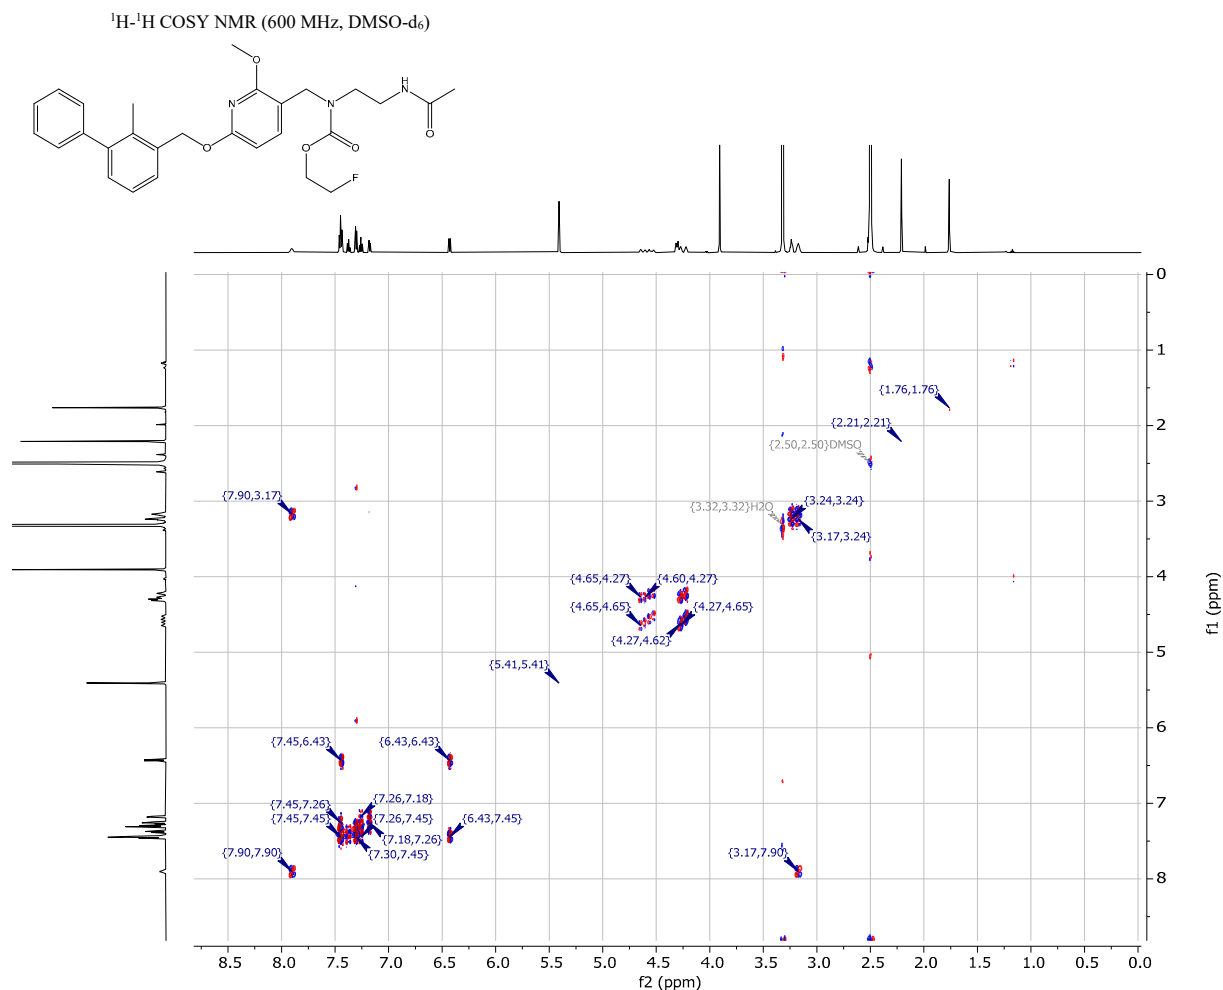

<sup>1</sup>H-NMR (600 MHz, DMSO-d<sub>6</sub>): δ 7.90, 7.90, 7.45, 7.45, 7.45, 7.45, 7.45, 7.37, 7.37, 7.30, 7.30, 7.26, 7.26, 7.26, 7.18, 7.18, 6.43, 6.43, 5.41, 4.65, 4.65, 4.62, 4.60, 4.57, 4.57, 4.52, 4.52, 4.27, 4.27, 4.27, 4.22, 4.22, 4.22, 3.24, 3.24, 3.17, 3.17, 3.17, 2.21, 1.76

<sup>1</sup>H-NMR (600 MHz, DMSO-d<sub>6</sub>): δ 7.90, 7.90, 7.45, 7.45, 7.45, 7.45, 7.45, 7.37, 7.37, 7.30, 7.30, 7.26, 7.26, 7.26, 7.18, 7.18, 6.43, 6.43, 5.41, 4.65, 4.65, 4.60, 4.60, 4.57, 4.57, 4.52, 4.52, 4.27, 4.27, 4.27, 4.22, 4.22, 4.22, 3.24, 3.24, 3.17, 3.17, 3.17, 2.21, 1.76.

**Supplementary Figure S39:** 2-fluoroethyl (2-acetamidoethyl)((2-methoxy-6-((2-methyl-[1,1'-biphenyl]-3-yl)methoxy)pyridin-3-yl)methyl)carbamate (**2d**):

$^1\text{H}$ - $^{13}\text{C}$  HSQC NMR (600 MHz, 151 MHz, DMSO- $d_6$ )

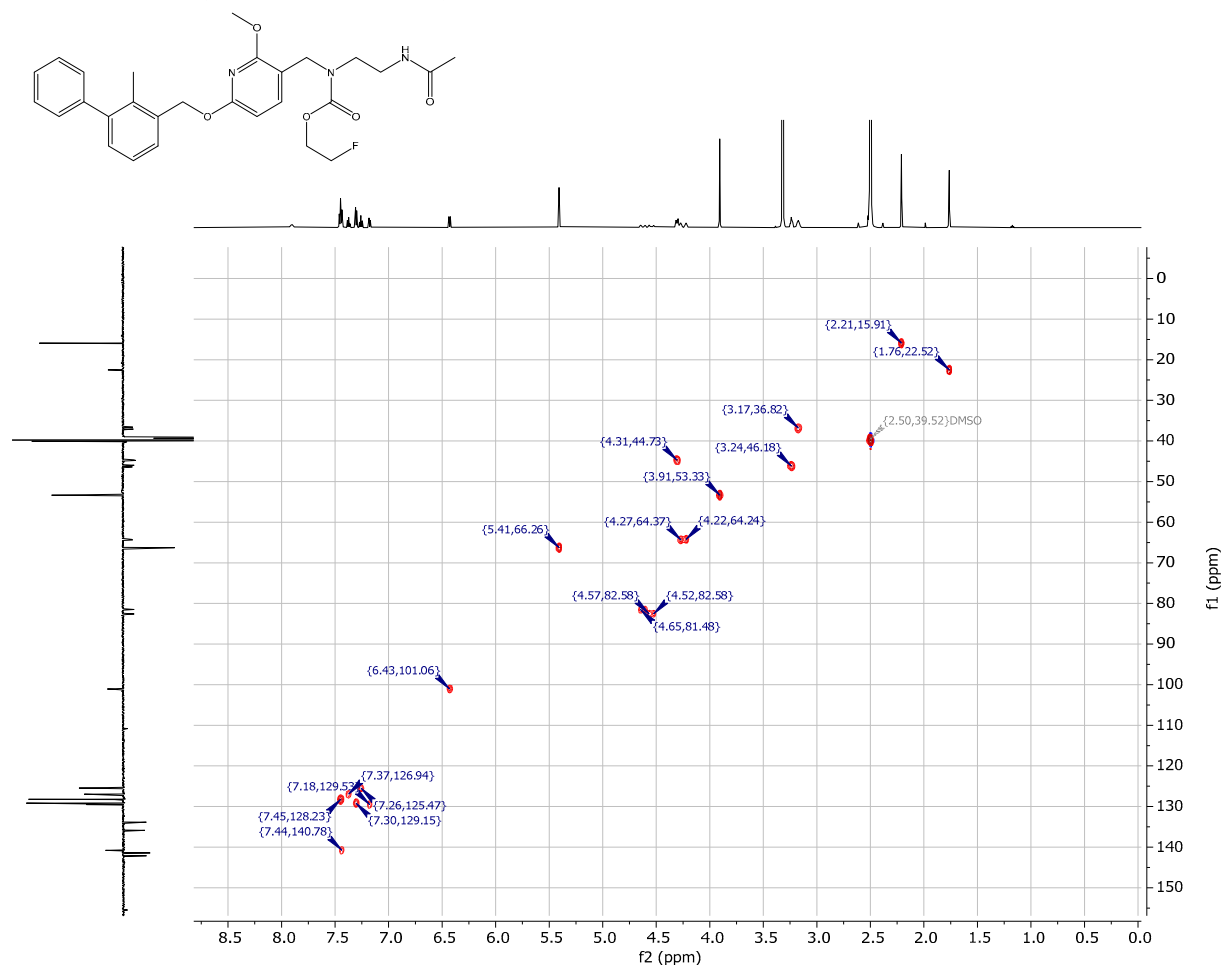

$^{13}\text{C}$ -NMR (151 MHz, DMSO- $d_6$ ):  $\delta$  140.78, 129.53, 129.15, 128.23, 126.94, 125.47, 101.06, 82.58, 82.58, 81.48, 81.48, 66.26, 64.24, 53.33, 46.18, 44.73, 36.82, 22.52, 15.91.

$^1\text{H}$ -NMR (600 MHz, DMSO- $d_6$ ):  $\delta$  7.45, 7.44, 7.37, 7.30, 7.26, 7.18, 6.43, 5.41, 4.65, 4.60, 4.57, 4.52, 4.31, 4.27, 4.22, 3.91, 3.24, 3.17, 2.21, 1.76.

## Mass spectrometry

**Supplementary Figure S40:** Methyl (*S*)-1-(2,6-dimethoxy-4-((2-methyl-[1,1'-biphenyl]-3-yl)methoxy)benzyl)piperidine-2-carboxylate (**1a**):

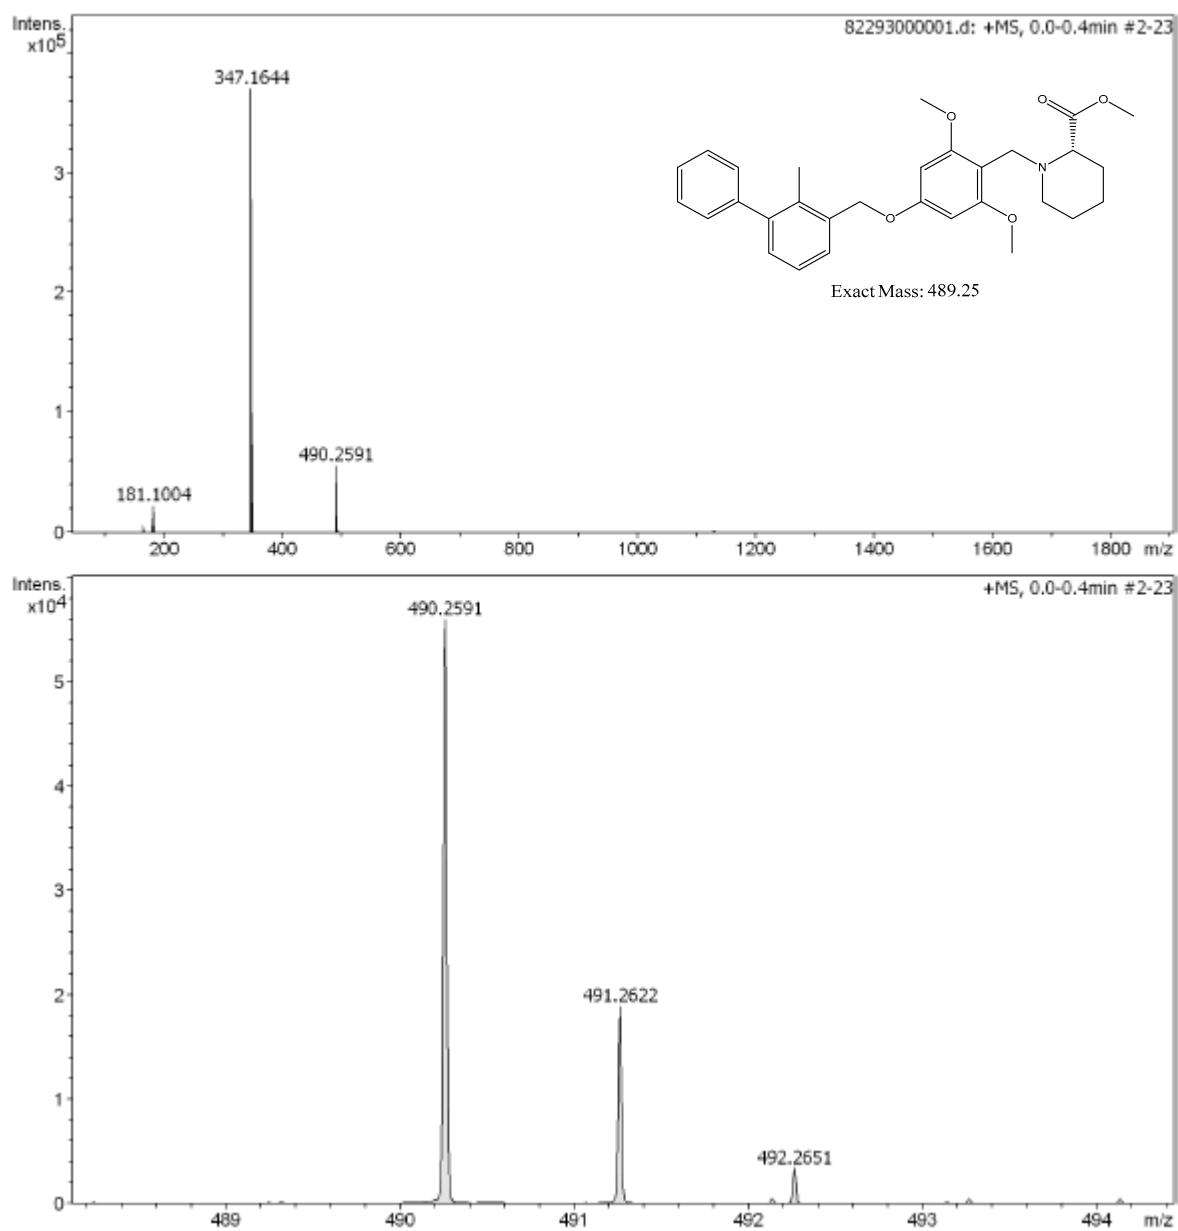

**Supplementary Figure S41:** 2-Fluoroethyl (S)-1-(2,6-dimethoxy-4-((2-methyl-[1,1'-biphenyl]-3-yl)methoxy)benzyl)piperidine-2-carboxylate (**1b**):

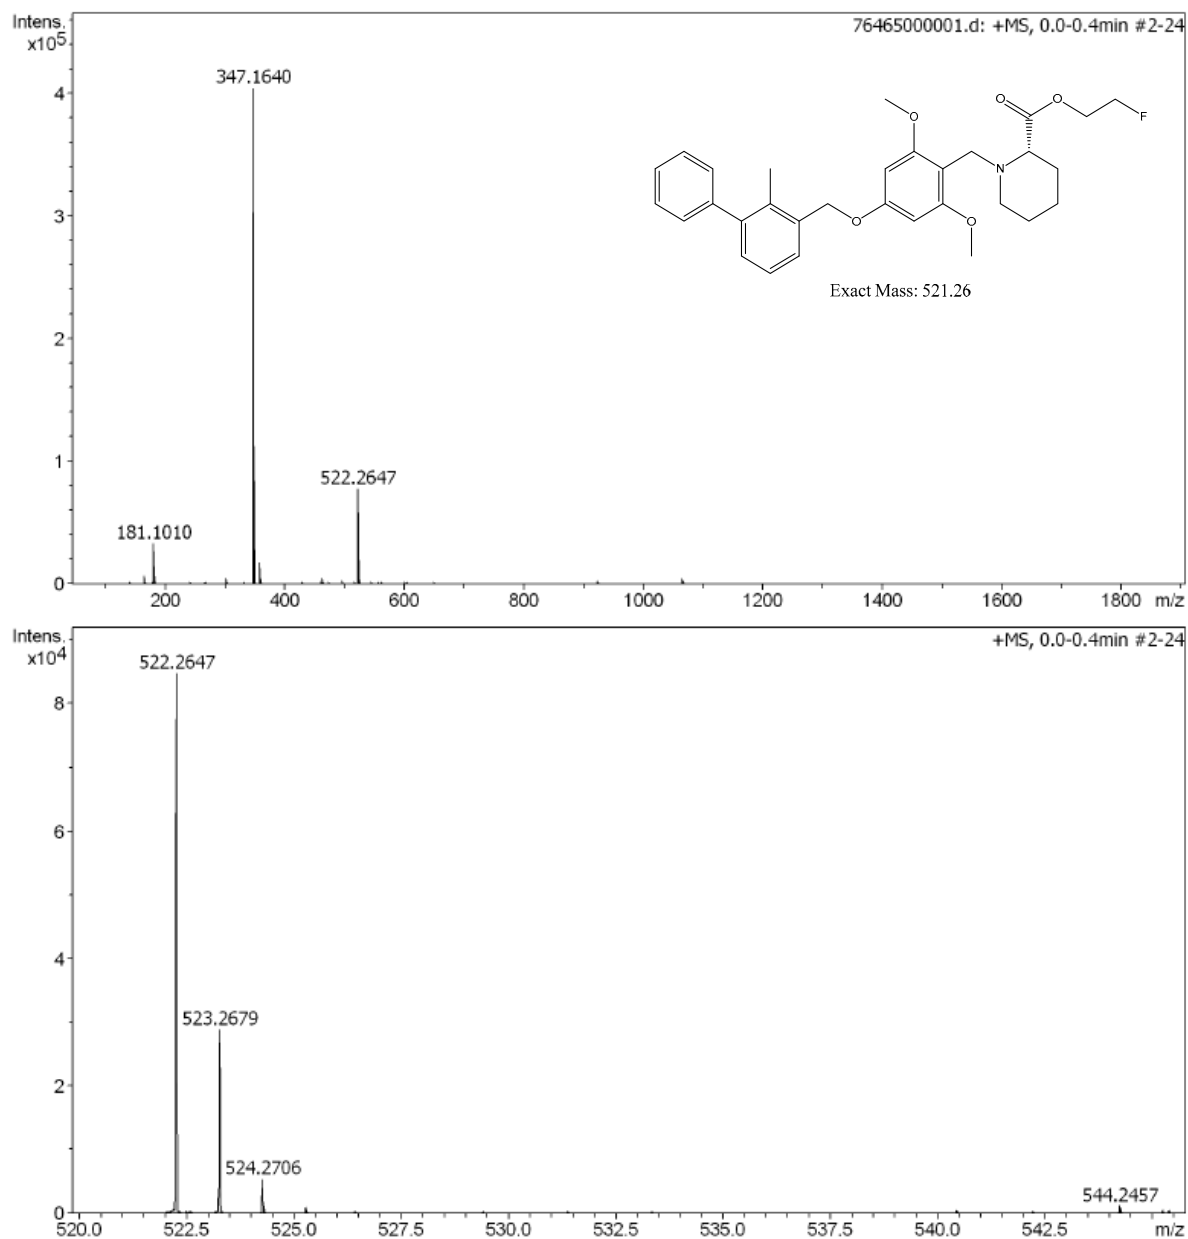

**Supplementary Figure S42:** *N*-(2-(((2-methoxy-6-((2-methyl-[1,1'-biphenyl]-3-yl)methoxy)pyridin-3-yl)methyl)(methylamino)ethyl)acetamide (**2a**):

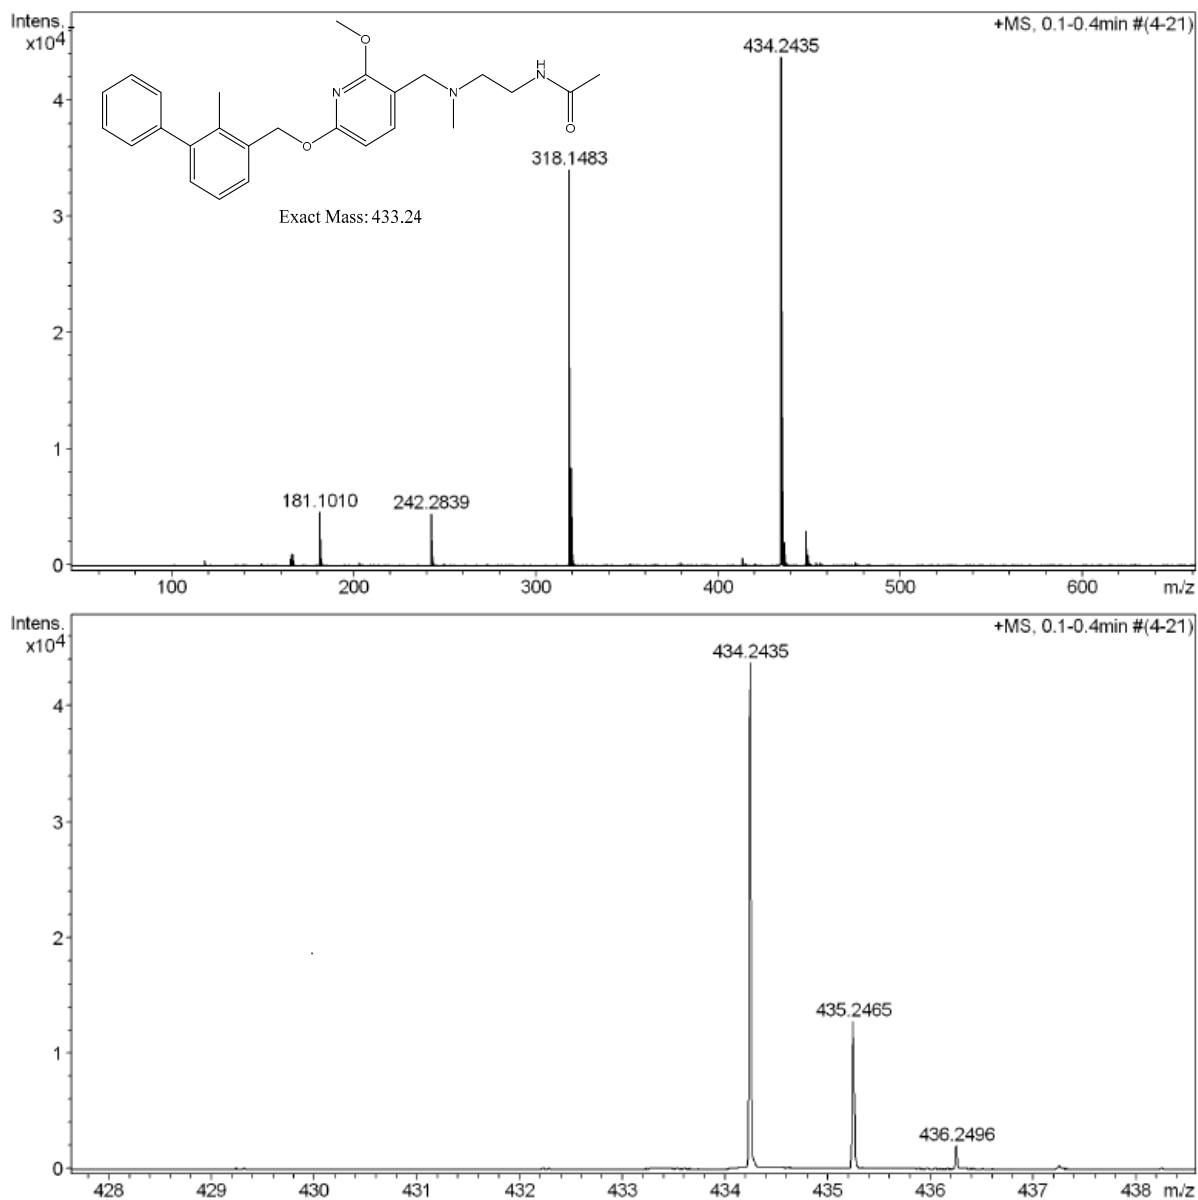



**Supplementary Figure S43:** *N*-(2-(((2-methoxy-6-((2-methyl-[1,1'-biphenyl]-3-yl)methoxy)pyridin-3-yl)methyl)amino)ethyl)-*N*-methylacetamide (**2b**):

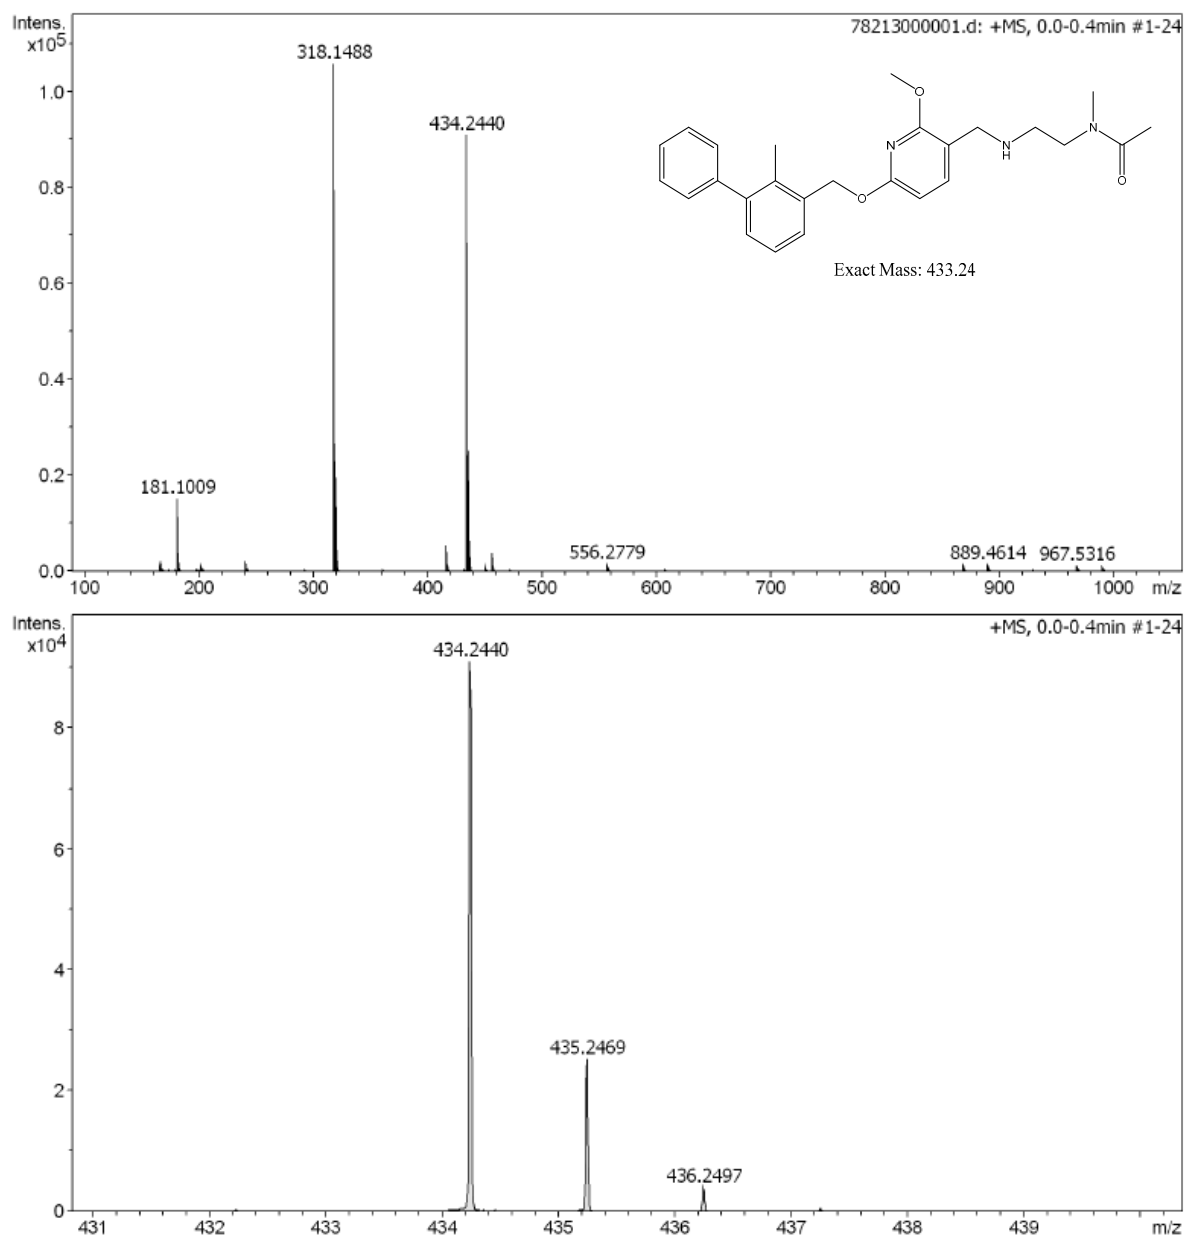

**Supplementary Figure S44:** *N*-(2-(((2-methoxy-6-((2-methyl-[1,1'-biphenyl]-3-yl)methoxy)pyridin-3-yl)methyl)(methylamino)ethyl)-*N*-methylacetamide (**2c**):

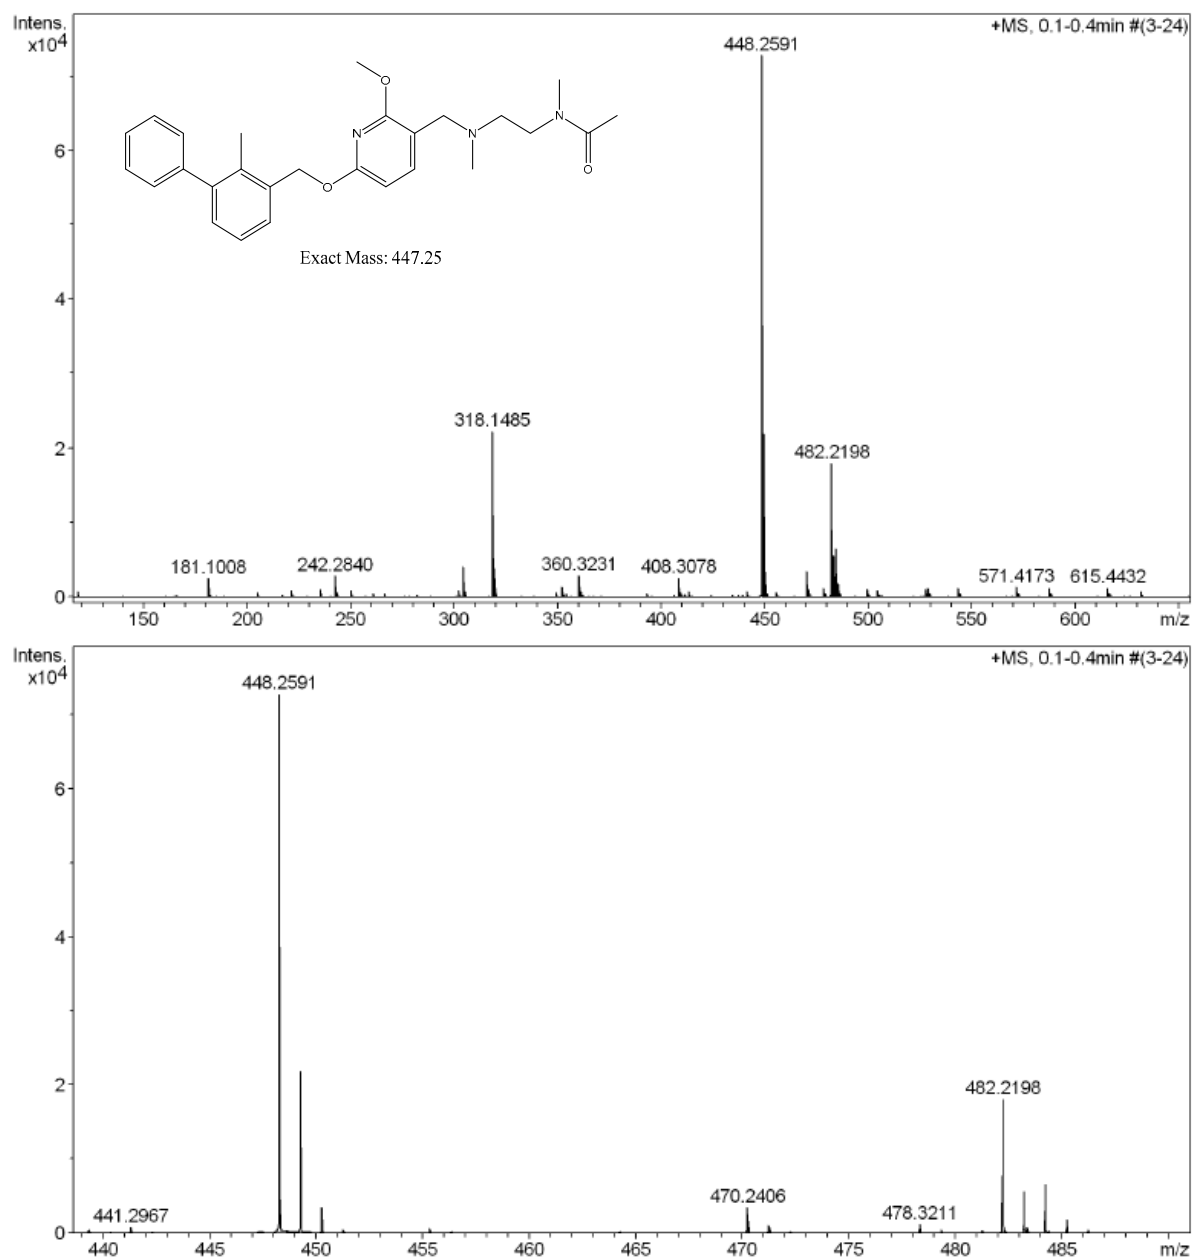

**Supplementary Figure S45:** 2-fluoroethyl (2-acetamidoethyl)((2-methoxy-6-((2-methyl-[1,1'-biphenyl]-3-yl)methoxy)pyridin-3-yl)methyl)carbamate (**2d**):

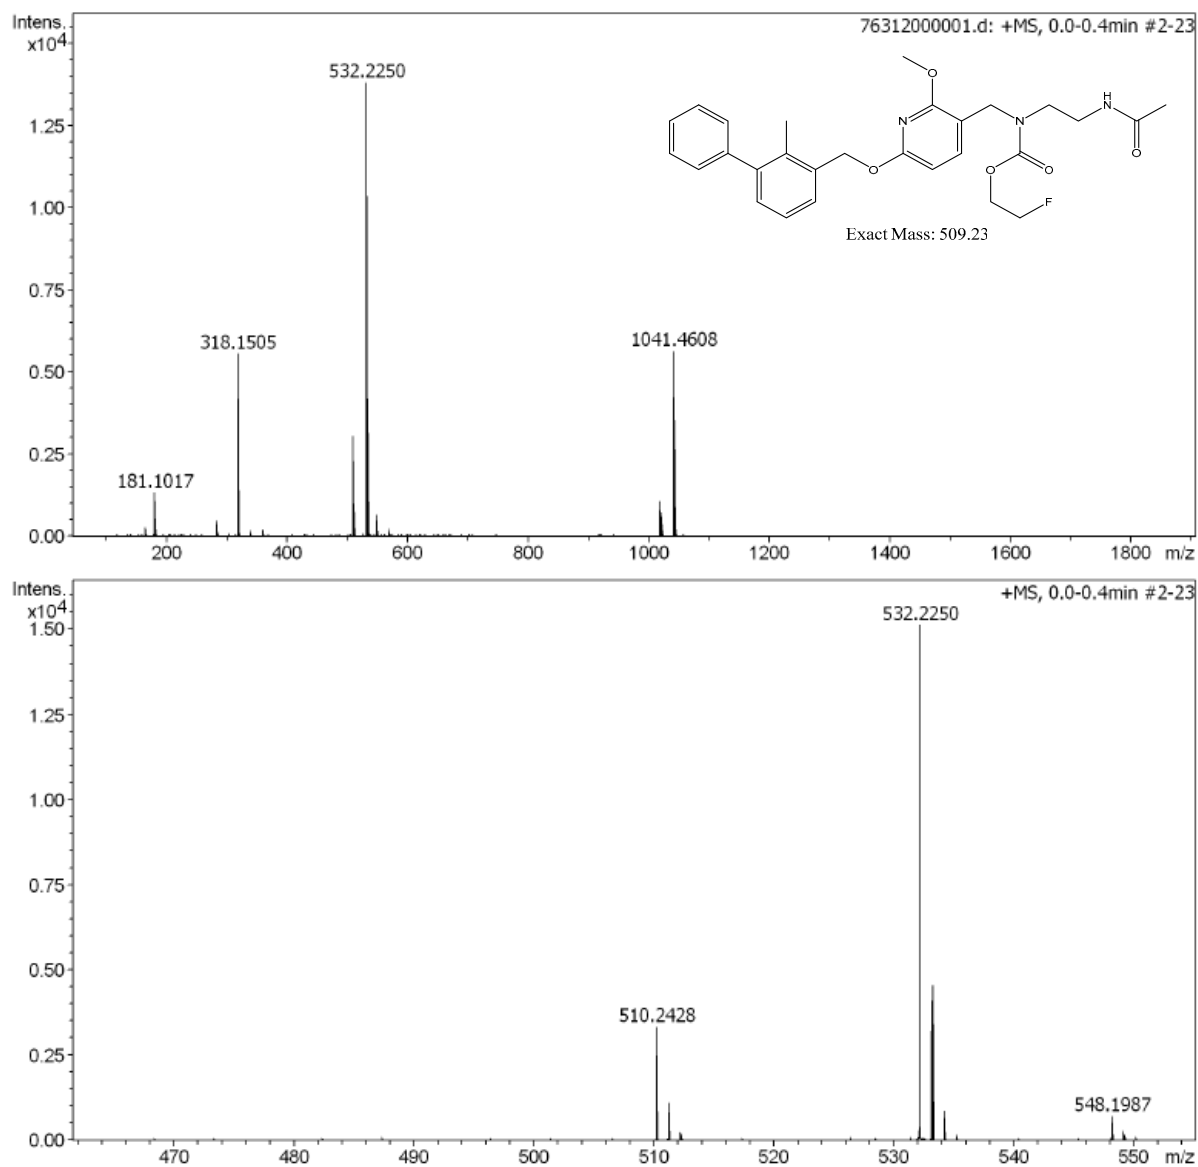

Supplement: s1 [file s1]
